# Supplementary material
Source: PubMed Central journal article supplement (PMC3519432)

**Chiral Indoline Synthesis Via Enantioselective Copper-Catalyzed Alkene  
Hydroamination/Cyclization**

Benjamin W. Turnpenny,<sup>‡</sup> Kianté L. Hyman<sup>‡</sup> and Sherry R. Chemler<sup>\*</sup>

Department of Chemistry, University at Buffalo,  
The State University of New York, Buffalo, NY 14260, [schemler@buffalo.edu](mailto:schemler@buffalo.edu)

**Supporting Information I**

**Table of Contents**

|                               |      |
|-------------------------------|------|
| General Information           | S-2  |
| Synthesis of Substrates       | S-2  |
| Synthesis of Chiral Indolines | S-6  |
| References                    | S-14 |
| HPLC Traces                   | S-15 |

**General Experimental Information:** All reagents were used out of the bottle as purchased from the supplier without further purification unless otherwise noted.  $\text{MnO}_2$  for the hydroamination experiments was purchased as activated, ca. 85%,  $<5 \mu\text{m}$ . Solvents for reactions were dried under Argon using a commercial solvent filtration system.  $^1\text{H}$  NMR spectra were recorded in  $\text{CDCl}_3$  (using 7.26 ppm for reference of residual  $\text{CHCl}_3$ ) at 300, 400 or 500 MHz.  $^{13}\text{C}$  NMR spectra were recorded in  $\text{CDCl}_3$  (using 77.0 ppm as internal reference) at 75.5 or 125.7 MHz. IR spectra were taken neat using a Nicolet-Impact 420 FTIR. Wave numbers in  $\text{cm}^{-1}$  are reported for characteristic peaks. High resolution mass spectra were obtained at SUNY Buffalo's mass spec. facility on a ThermoFinnigan MAT XL spectrometer. Optical rotations were obtained using a JASCO P-2000 Polarimeter fitted with a micro cell with a 100 mm path length. Melting points are reported as uncorrected.

Substrates **1** were prepared from the corresponding anilines as previously reported.<sup>1-3</sup> Substrates **1a**, **1b**, **1e**, and **1k** are known compounds.

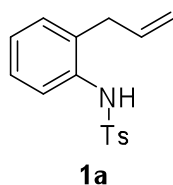

#### ***N*-(2-Allyl-phenyl)-4-methyl-benzenesulfonamide (1a)<sup>4</sup>**

The known sulfonamide **1a** was obtained from sulfonylation of 2-allylaniline with tosyl chloride in 62% yield (1.33 g). The  $^1\text{H}$  NMR spectrum matched the reported values.<sup>4</sup>  $^1\text{H}$  NMR (400 MHz,  $\text{CDCl}_3$ )  $\delta$  7.60 (d,  $J=8.0$  Hz, 2H), 7.41 (d,  $J=8.0$  Hz, 1H), 7.26-7.18 (m, 3H), 7.14-7.06 (m, 2H), 6.53 (s, 1H), 5.83-5.73 (m, 1H), 5.11 (dd,  $J=8.4, 1.6$  Hz, 1H), 4.93 (dd,  $J=15.6, 1.6$  Hz, 1H), 3.01 (d,  $J=6.0$  Hz, 2H), 2.40 (s, 3H).

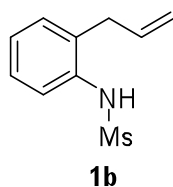

#### ***N*-(2-Allyl-phenyl)-4-methyl-sulfonamide (1b)<sup>4</sup>**

The known sulfonamide **1b** was obtained from sulfonylation of 2-allylaniline with methanesulfonyl chloride in 82% yield (3.46 g). The  $^1\text{H}$  NMR spectrum matched the reported values.<sup>4</sup>  $^1\text{H}$  NMR (500 MHz,  $\text{CDCl}_3$ )  $\delta$  7.51 (d,  $J=8.0$  Hz, 1H), 7.30-7.16 (m, 3H), 6.40 (s, 1H), 5.99-5.92 (m, 1H), 5.20 (dd,  $J=9.5, 1.0$  Hz, 1H), 5.08 (dd,  $J=16.0, 1.0$  Hz, 1H), 3.44 (d,  $J=6.5$  Hz, 2H), 3.01 (s, 3H).

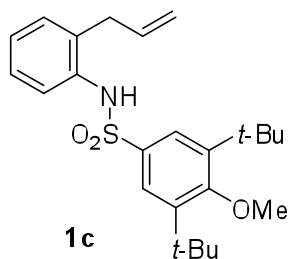

### ***N*-(2-Allylphenyl)-3,5-di-*tert*-butyl-4-methoxybenzenesulfonamide (**1c**)**

The sulfonamide **1c** was obtained from sulfonylation of 2-allylaniline with 3,5-bis(1,1-dimethylethyl)-4-methoxy-benzenesulfonyl chloride, which was synthesized as reported by Toru and coworkers.<sup>5</sup> 2-Allylaniline (0.847 g, 6.4 mmol) was dissolved in 40 mL of dry methylene chloride and cooled to 0 °C in an ice water bath. The solution was treated with pyridine (2.3 mL, 19.1 mmol, 3 equiv), 3,5-bis(1,1-dimethylethyl)-4-methoxy-benzenesulfonyl chloride (2.43 g, 7.6 mmol, 1.2 equiv), and 4-dimethylaminopyridine (78 mg, 0.64 mmol, (0.1 equiv)). The mixture stirred overnight, warming up to rt. The mixture was diluted with 40 mL of water and extracted with CH<sub>2</sub>Cl<sub>2</sub> (3 x 40 mL). The combined organic layers were washed with brine, dried over MgSO<sub>4</sub>, and concentrated in vacuo. Flash chromatography of the resulting crude product on SiO<sub>2</sub> (5-20% ether in hexanes gradient) afforded sulfonamide **1c** as a white solid in 67% yield (1.77 g). mp 173-175 °C; <sup>1</sup>H NMR (400 MHz, CDCl<sub>3</sub>) δ 7.52 (d, J=7.6 Hz, 1H), 7.49 (s, 2H), 7.28-7.23 (m, 1H), 7.13 (t, J=16.4 Hz, 1H), 7.04 (d, J=8 Hz, 1H), 6.40 (s, 1H), 5.70-5.64 (m, 1H), 5.08 (dd, J=8.4, 1.6 Hz, 1H), 4.90 (dd, J=15.6, 1.6 Hz, 1H), 3.66 (s, 3H), 2.80 (d, J=6 Hz, 2H), 1.31 (s, 18H); <sup>13</sup>C NMR (75.5 MHz, CDCl<sub>3</sub>) δ 163.5, 145.1, 135.5, 135.3, 133.0, 132.4, 130.3, 127.8, 126.5, 125.7, 125.5, 117.1, 64.7, 36.1, 35.9, 31.6; IR (neat, thin film) ν 3264, 2957, 1641, 1456, 1406, 1392, 1365, 1337, 1275, 1229, 1166, 1118, 1008, 910 cm<sup>-1</sup>; HRMS (ESI) calcd for [M]<sup>+</sup> C<sub>24</sub>H<sub>33</sub>O<sub>3</sub>N<sub>1</sub>S<sub>1</sub>: 415.2181, found 415.2183.

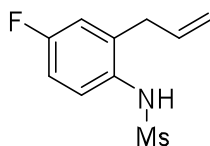

**1d**

### ***N*-(2-Allyl-4-fluorophenyl)methanesulfonamide (**1d**)**

Sulfonamide **1d** was obtained as a white solid from sulfonylation of 2-allyl-4-fluoroaniline with methane sulfonyl chloride in 58% yield (220 mg). mp 81-83 °C; <sup>1</sup>H NMR (400 MHz, CDCl<sub>3</sub>) δ 7.47-7.44 (m, 1H), 7.01-6.96 (m, 2H), 6.23 (s, 1H), 5.97-5.88 (m, 1H), 5.22 (dd, J=8.4, 1.6 Hz, 1H), 5.08 (dd, J=15.6, 1.6 Hz, 1H), 3.44 (d, J=4.4 Hz, 2H), 3.00 (s, 3H); <sup>13</sup>C NMR (125.7 MHz, CDCl<sub>3</sub>) δ 161.0 (d, J<sub>CF</sub>=246.2 Hz), 136.3 (d, J<sub>CF</sub>=8.1 Hz), 134.9, 130.4 (d, J<sub>CF</sub>=3.5 Hz), 126.7 (d, J<sub>CF</sub>=8.1 Hz), 117.5, 117.3 (d, J<sub>CF</sub>=23.0 Hz), 114.4 (d, J<sub>CF</sub>=21.9 Hz), 39.8, 35.9; IR (neat, thin film) ν 3271, 2932, 1591, 1496, 1391, 1326, 1213, 1153, 966 cm<sup>-1</sup>; HRMS (ESI) calcd for [M]<sup>+</sup> C<sub>10</sub>H<sub>12</sub>O<sub>2</sub>N<sub>1</sub>F<sub>1</sub>S<sub>1</sub>: 229.0573, found 229.0579.

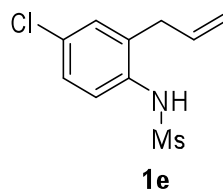

### ***N*-(2-Allyl-4-chlorophenyl)methanesulfonamide (1e)<sup>6</sup>**

The known sulfonamide **1e** was obtained from sulfonylation of 2-allyl-4-chloroaniline with methanesulfonyl chloride in 64% yield (235 mg). The <sup>1</sup>H NMR spectrum matched the reported.<sup>6</sup> <sup>1</sup>H NMR (300 MHz, CDCl<sub>3</sub>) δ 7.46 (d, J=8.1 Hz, 1H), 7.27-7.22 (m, 2H), 6.35 (s, 1H), 5.97-5.88 (m, 1H), 5.23 (dd, J=8.7, 1.8 Hz, 1H), 5.09 (dd, J=16.0, 1.8 Hz, 1H), 3.40 (d, J=6.0 Hz, 2H), 3.00 (s, 3H).

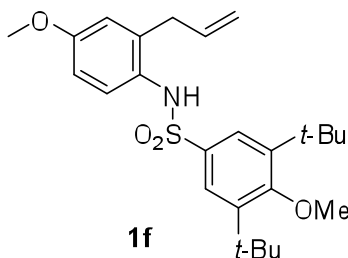

### ***N*-(2-Allyl-4-methoxyphenyl)-3,5-di-*tert*-butyl-4-methoxybenzenesulfonamide (1f)**

Sulfonamide **1f** was obtained as a white solid from sulfonylation of 2-allyl-4-methoxyaniline in 48% yield (397 mg) using the same procedure as described for **1c**. mp 144-146 °C; <sup>1</sup>H NMR (500 MHz, CDCl<sub>3</sub>) δ 7.46 (s, 2H), 7.33 (d, J=9.0 Hz, 1H), 6.76 (d, J=9.0 Hz, 1H), 6.58 (s, 1H), 6.20 (s, 1H), 5.66-5.60 (m, 1H), 5.05 (dd, J=7.0, 1.5 Hz, 1H), 4.89 (dd, J=15.5, 1.5 Hz, 1H), 3.76 (s, 3H), 3.67 (s, 3H), 2.72 (d, J=6.5 Hz, 2H), 1.32 (s, 18H); <sup>13</sup>C NMR (125.7 MHz, CDCl<sub>3</sub>) δ 163.5, 158.5, 157.1, 145.1, 135.9, 135.4, 133.0, 128.7, 127.7, 125.7, 117.0, 115.6, 112.5, 64.7, 55.5, 36.1, 36.0, 31.7; IR (neat, thin film) ν 3235, 2964, 2360, 1614, 1579, 1495, 1403, 1331, 1290, 1256, 1227, 1167, 1128, 1043, 1004, 915 cm<sup>-1</sup>; HRMS (ESI) calcd for [M+H]<sup>+</sup> C<sub>25</sub>H<sub>36</sub>O<sub>4</sub>N<sub>1</sub>S<sub>1</sub>: 446.2360, found 446.2373.

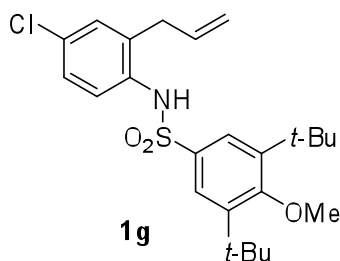

### ***N*-(2-Allyl-4-chlorophenyl)-3,5-di-*tert*-butyl-4-methoxybenzenesulfonamide (1g)**

Sulfonamide **1g** (322 mg, 60% yield) was obtained from sulfonylation of 2-allyl-4-chloroaniline using the same procedure as described for **1c**. mp 148-150 °C; <sup>1</sup>H NMR (400 MHz, CDCl<sub>3</sub>) δ

7.49 (s, 2H), 7.44 (d,  $J=8.8$  Hz, 1H), 7.22 (d,  $J=8.8$  Hz, 1H), 7.04 (s, 1H), 6.36 (s, 1H), 5.65-5.60 (m, 1H), 5.11 (dd,  $J=8.4$ , 1.2 Hz, 1H), 4.91 (dd,  $J=16.0$ , 1.2 Hz, 1H), 3.67 (s, 3H), 2.79 (d,  $J=5.6$  Hz, 2H), 1.33 (s, 18H);  $^{13}\text{C}$  NMR (75.5 MHz,  $\text{CDCl}_3$ )  $\delta$  163.7, 145.3, 134.6, 134.5, 133.8, 132.8, 132.0, 130.0, 127.7, 127.0, 125.5, 117.8, 64.7, 36.1, 35.6, 31.6; IR (neat, thin film)  $\nu$  3259, 2963, 1700, 1650, 1481, 1392, 1333, 1256, 1227, 1167, 1115, 1005, 886  $\text{cm}^{-1}$ ; HRMS (ESI) calcd for  $[\text{M}]^+$   $\text{C}_{24}\text{H}_{32}\text{O}_3\text{N}_1\text{Cl}_1\text{S}_1$ : 449.1791, found 449.1788.

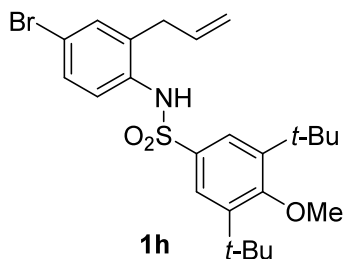

### ***N*-(2-Allyl-4-bromophenyl)-3,5-di-*tert*-butyl-4-methoxybenzenesulfonamide (**1h**)**

The sulfonamide **1h** (280 mg, 47% yield) was obtained using the same procedure as described for **1c**. mp 152-154°C;  $^1\text{H}$  NMR (400 MHz,  $\text{CDCl}_3$ )  $\delta$  7.49 (s, 2H), 7.38-7.37 (m, 2H), 7.19 (s, 1H), 6.34 (s, 1H), 5.67-5.60 (m, 1H), 5.12 (dd,  $J=7.2$ , 1.6 Hz, 1H), 4.92 (dd,  $J=14.0$ , 1.6 Hz, 1H), 3.67 (s, 3H), 2.79 (d,  $J=6.0$  Hz, 2H), 1.33 (s, 18H);  $^{13}\text{C}$  NMR (75.5 MHz,  $\text{CDCl}_3$ )  $\delta$  163.7, 145.3, 134.6, 134.5, 134.4, 133.0, 132.7, 130.7, 127.1, 125.5, 119.8, 117.8, 64.7, 36.1, 35.6, 31.6; IR (neat, thin film)  $\nu$  3264, 2962, 1481, 1392, 1329, 1256, 1227, 1166, 1116, 1005, 913  $\text{cm}^{-1}$ ; HRMS (ESI) calcd for  $[\text{M}+\text{H}]^+$   $\text{C}_{24}\text{H}_{33}\text{O}_3\text{N}_1\text{Br}_1\text{S}_1$ : 494.1359, found 494.1350.

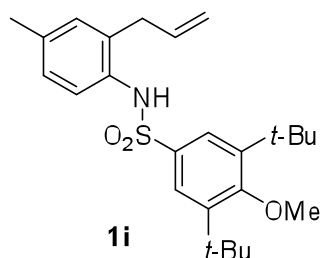

### ***N*-(2-Allyl-4-methylphenyl)-3,5-di-*tert*-butyl-4-methoxybenzenesulfonamide (**1i**)**

The sulfonamide **1i** (248 mg, 34% yield) was obtained using the same procedure as described for **1c**. mp 161-163°C;  $^1\text{H}$  NMR (400 MHz,  $\text{CDCl}_3$ )  $\delta$  7.46 (s, 2H), 7.36 (d,  $J=8.0$  Hz, 1H), 7.05 (d,  $J=8.0$  Hz, 1H), 6.84 (s, 1H), 6.29 (s, 1H), 5.70-5.60 (m, 1H), 5.06 (dd,  $J=8.8$ , 1.6 Hz, 1H), 4.89 (dd,  $J=15.6$ , 1.6 Hz, 1H), 3.66 (s, 3H), 2.73 (d,  $J=6.0$  Hz, 2H), 2.27 (s, 3H), 1.31 (s, 18H);  $^{13}\text{C}$  NMR (125.7 MHz,  $\text{CDCl}_3$ )  $\delta$  163.5, 145.0, 136.6, 135.6, 133.0, 132.8, 132.5, 130.8, 128.3, 126.2, 125.6, 116.9, 64.7, 36.1, 35.9, 31.6, 20.8; IR (neat, thin film)  $\nu$  3252, 2958, 1394, 1335, 1228, 1166, 1116, 1006, 908  $\text{cm}^{-1}$ ; HRMS (ESI) calcd for  $[\text{M}]^+$   $\text{C}_{25}\text{H}_{35}\text{O}_3\text{N}_1\text{S}_1$ : 429.2332, found 429.2342.

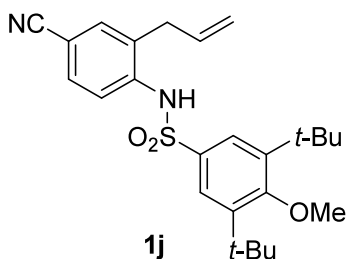

### ***N*-(2-Allyl-4-cyanophenyl)-3,5-di-*tert*-butyl-4-methoxybenzenesulfonamide (1j)**

Sulfonamide **1j** (96 mg, 56% yield) was obtained from sulfonylation of 3-allyl-4-aminobenzonitrile using the same procedure as described for **1c**. mp 158-160°C; <sup>1</sup>H NMR (400 MHz, CDCl<sub>3</sub>) δ 7.67 (d, J=8.0 Hz, 1H), 7.57 (s, 2H), 7.54 (d, J=10.8 Hz, 1H), 7.36 (s, 1H), 6.72 (s, 1H), 5.71-5.67 (m, 1H), 5.18 (dd, J=8.7, 1.2 Hz, 1H), 4.95 (dd, J=16.0, 1.2 Hz, 1H), 3.67 (s, 3H), 3.02 (d, J=5.6 Hz, 2H), 1.34 (s, 18H); <sup>13</sup>C NMR (125.7 MHz, CDCl<sub>3</sub>) δ 164.0, 145.6, 139.9, 134.1, 133.7, 132.5, 131.7, 131.0, 125.5, 122.7, 118.5, 118.3, 108.76, 64.7, 53.4, 36.1, 35.6, 31.6, 22.6, 14.1; IR (neat, thin film) ν 3279, 2965, 2230, 1607, 1575, 1494, 1396, 1339, 1254, 1228, 1168, 1117, 1003, 912 cm<sup>-1</sup>; HRMS (ESI) calcd for [M]<sup>+</sup> C<sub>25</sub>H<sub>32</sub>O<sub>3</sub>N<sub>2</sub>S<sub>1</sub>: 440.2128, found 440.2130.

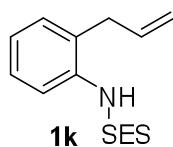

### ***N*-(2-Allylphenyl)-2-(trimethylsilyl)ethanesulfonamide (1k)<sup>2</sup>**

The known sulfonamide **1k** was obtained from sulfonylation of 2-allylaniline with 2-(trimethylsilyl)ethanesulfonyl chloride in 80% yield (1.05 g). The <sup>1</sup>H NMR spectra matched the reported values.<sup>2</sup> <sup>1</sup>H NMR (400 MHz, CDCl<sub>3</sub>) δ 7.46 (d, J=8.0 Hz, 1H), 7.28-7.13 (m, 3H), 6.32 (s, 1H), 6.00-5.92 (m, 1H), 5.19 (dd, J=8.4, 1.6 Hz, 1H), 5.08 (dd, J = 16.6, 1.6 Hz, 1H), 3.44 (d, J = 7.6 Hz, 2H), 3.07-3.03 (m, 2H), 1.07-1.03 (m, 2H), 0.0 (s, 9H).

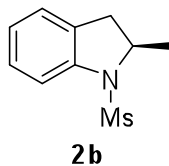

## **Representative Procedure for the Catalytic Enantioselective Hydroamination**

### **(*R*)-2-Methyl-1-(methylsulfonyl)indoline (2b)<sup>7</sup>**

Cu(OTf)<sub>2</sub> (12.8 mg, 0.036 mmol, 15 mol%), in a nitrogen filled glove box, was placed in a glass pressure tube equipped with a magnetic stir bar. A solution of (*R,R*)-Ph-box (15.0 mg, 0.045 mmol, 19 mol%) in dry PhCH<sub>3</sub> (2.4 mL, 0.1 M) was added via syringe through a septum. The

tube was capped and the reaction mixture was placed in a 60 °C oil bath and stirred. After 2 h, the catalyst solution was cooled to 23 °C. The sulfonamide substrate **2b** (50 mg, 0.237 mmol, 1 equiv) was added to the glass pressure tube, under an argon atmosphere, and the resulting solution was treated with 2,6-di-*tert*-butyl-4-methylpyridine (48.7 mg, 0.237 mmol, 1 equiv), MnO<sub>2</sub> (61.8 mg, 0.711 mmol, 3 equiv), and 1,4-cyclohexadiene (0.068 mL, 57.0 mg, 0.711 mmol, 3 equiv). Flame-dried 4 Å mol. sieves (20 mg/mL) were stirred at rt for 20 min before being added to the reaction mixture. The tube was capped and the reaction mixture was placed in a 100 °C oil bath and stirred. After 8 h, the reaction mixture was cooled to 23 °C, diluted with EtOAc (10 mL), sonicated, filtered through Celite with EtOAc (140 mL), and concentrated *in vacuo*. Flash chromatography on SiO<sub>2</sub> (10-25% EtOAc/hexanes gradient) provided purified hydroamination adduct **2b** (36.5 mg, 73%). The product was further purified by HPLC and subsequently analyzed via chiral HPLC column [Regis (*S,S*)-Whelk, 5% IPA/hexanes, 1 mL/min,  $\lambda=254$  nm,  $t(\text{major}) = 16.63$  min,  $t(\text{minor}) = 14.93$  min] revealing 77% enantiomeric excess.  $[\alpha]_{\text{D}}^{19} = -14.9$  ( $c$  0.7, CHCl<sub>3</sub>); <sup>1</sup>H NMR (400 MHz, CDCl<sub>3</sub>)  $\delta$  7.42 (d,  $J=8.8$  Hz, 1H), 7.22-7.18 (m, 2H), 7.05 (t,  $J=16.0$  Hz, 1H), 4.47-4.42 (m, 1H), 3.49-3.42 (m, 1H), 2.84 (s, 3H), 2.70 (dd,  $J=12.4, 4.0$  Hz, 1H), 1.45 (d,  $J=6.8$  Hz, 3H). This <sup>1</sup>H NMR matched the reported values.<sup>7</sup>

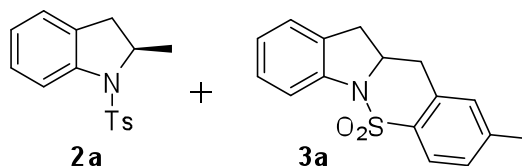

### (*R*)-2-Methyl-1-tosylindoline (**2a**)<sup>7</sup>

Hydroamination adduct **2a** (11.0 mg, 39%) was obtained using the general catalytic enantioselective hydroamination procedure, except 20 mol% of Cu(OTf)<sub>2</sub> and 25 mol% of (*R,R*)-Ph-box was used and the reaction was run at 110 °C. The hydroamination to carboamination ratio was determined to be 43:57 based on the integrations of the hydrogen peak at 4.34 ppm at the 2-position of the hydroamination product and the hydrogen peak at 4.90 ppm at the 11a-position of the carboamination product in the crude <sup>1</sup>H NMR spectrum. (The spectral data of carboamination product **3a** has previously been reported by our group<sup>8</sup>). Hydroamination adduct **2a** was purified by flash chromatography on SiO<sub>2</sub> (10-25% EtOAc/hexanes gradient). The product was further purified by HPLC and subsequently analyzed via chiral HPLC column [Regis (*S,S*)-Whelk, 5% IPA/hexanes, 1 mL/min,  $\lambda=254$  nm,  $t(\text{major}) = 12.80$  min,  $t(\text{minor}) = 15.43$  min] revealing 90% enantiomeric excess.  $[\alpha]_{\text{D}}^{23} = +161.7$  ( $c$  0.22, CHCl<sub>3</sub>, 90% ee). <sup>1</sup>H NMR (500 MHz, CDCl<sub>3</sub>)  $\delta$  7.65 (d,  $J=8.0$  Hz, 1H), 7.55 (d,  $J=8.5$  Hz, 2H), 7.21 (t,  $J=12.0$  Hz, 1H), 7.16 (d,  $J=8.5$  Hz, 2H), 7.05-6.99 (m, 2H), 4.36-4.32 (m, 1H), 2.92-2.87 (m, 1H), 2.43 (dd,  $J=12.5, 3.0$  Hz, 1H), 2.35 (s, 3H), 1.43 (d,  $J=6.5$  Hz, 3H).

**11a,12-dihydro-2-methyl-5,5-dioxide-11*H*-Indolo[1,2-*b*][1,2]benzothiazine (3a)<sup>8</sup>**

Carboamination adduct **3a** (13.0 mg, 46%) was obtained from the same reaction as **2a** as a colorless solid. <sup>1</sup>H NMR (500 MHz, CDCl<sub>3</sub>) 7.74 (d, J=8.0 Hz, 1 H), 7.55 (d, J=8.0 Hz, 1 H), 7.18-6.96 (m, 5 H), 4.94-4.89 (m, 1 H), 3.49 (dd, J=10.5, 5.5 Hz, 1 H), 3.34 (dd, J=9.0, 7.0 Hz, 1 H), 3.07 (dd, J=9.5, 6.6 Hz, 1 H), 2.93 (dd, J=8.0, 7.5 Hz, 1 H), 2.37 (s, 3 H).

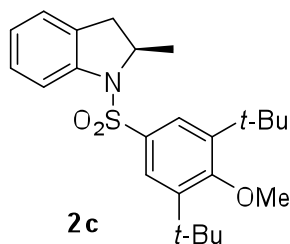**(*R*)-1-(3,5-Di-*tert*-butyl-4-methoxyphenylsulfonyl)-2-methylindoline (2c)**

Hydroamination adduct **2c** (35.9 mg, 72%) was obtained using the same procedure as for **2b** except 20 mol% of Cu(OTf)<sub>2</sub>, 25 mol% of (*R,R*)-Ph-box, and 5 equiv of 1,4-cyclohexadiene were used and the reaction was run at 110 °C. Compound **2c** was obtained as a white solid. The hydroamination to carboamination ratio was determined to be 94:6 based on the relative integrations of the hydrogen peak at 4.27 ppm at the 2-position of the hydroamination product to the hydrogen peak at 4.87 ppm at the 11a-position of the carboamination product in the crude <sup>1</sup>H NMR. Data for **2c**: mp 147-150 °C; [ $\alpha$ ]<sub>D</sub><sup>18</sup> = +117.8 (*c* 0.54, CHCl<sub>3</sub>); <sup>1</sup>H NMR (400 MHz, CDCl<sub>3</sub>)  $\delta$  7.68 (d, J=8.4 Hz, 1H), 7.47 (s, 2H), 7.22 (t, J=11.6 Hz, 1H), 7.04-7.02 (m, 2H), 4.30-4.25 (m, 1H), 3.62 (s, 3H), 2.73-2.66 (m, 1H), 2.38 (dd, J=14.0, 1.6 Hz, 1H), 1.40 (d, J=6.4 Hz, 3H), 1.27 (s, 18H); <sup>13</sup>C NMR (125.7 MHz, CDCl<sub>3</sub>)  $\delta$  163.4, 157.1, 144.9, 141.5, 132.2, 131.8, 127.7, 125.4, 125.1, 124.8, 118.0, 64.6, 58.5, 36.1, 36.0, 31.6, 23.3; IR (neat, thin film)  $\nu$  2963, 1603, 1478, 1461, 1406, 1356, 1254, 1226, 1170, 1128, 1004, 883 cm<sup>-1</sup>; HRMS (ESI) calcd for [M]<sup>+</sup> C<sub>24</sub>H<sub>34</sub>O<sub>3</sub>N<sub>1</sub>S<sub>1</sub>: 416.2254, found 416.2244.

Hydroamination adduct **2c** was purified by flash chromatography on SiO<sub>2</sub> (2-20% EtOAc/hexanes gradient). The product was further purified by HPLC and subsequently analyzed via chiral HPLC column [Regis (*S,S*)-Whelk, 1% IPA/hexanes, 1 mL/min,  $\lambda$ =254 nm, t(major) = 12.59 min, t(minor) = 11.75 min] revealing 86% enantiomeric excess.



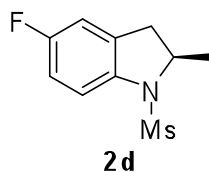

**(R)-5-Fluoro-2-methyl-1-(methylsulfonyl)indoline (2d)**

Hydroamination adduct **2d** (34.5 mg, 69%) was obtained using the same procedure as for **2b**. Compound **2d** was obtained as a colorless oil.  $[\alpha]_D^{22} = +12.3$  ( $c$  0.06,  $\text{CHCl}_3$ );  $^1\text{H NMR}$  (400 MHz,  $\text{CDCl}_3$ )  $\delta$  7.38-7.35 (m, 1H), 6.92-6.87 (m, 1H), 4.48-4.43 (m, 1H), 3.48-3.40 (m, 1H), 2.82 (s, 3H), 2.68 (dd,  $J=12.8, 2.7$  Hz, 1H), 1.45 (d,  $J=6.4$  Hz, 3H);  $^{13}\text{C NMR}$  (75.5 MHz,  $\text{CDCl}_3$ )  $\delta$  116.5 (d,  $J_{\text{CF}}=8.1$  Hz), 114.6 (d,  $J_{\text{CF}}=23.0$  Hz), 112.7 (d,  $J_{\text{CF}}=24.2$  Hz), 59.3, 36.5, 36.0, 23.4; IR (neat, thin film)  $\nu$  2932, 1706, 1605, 1507, 1484, 1462, 1418, 1380, 1345, 1215, 1162, 1096, 1066, 962  $\text{cm}^{-1}$ ; HRMS (ESI) calcd for  $[\text{M}]^+$   $\text{C}_{10}\text{H}_{12}\text{O}_2\text{N}_1\text{F}_1\text{S}_1$ : 229.0573, found 229.0563.

Hydroamination adduct **2d** was purified by flash chromatography on  $\text{SiO}_2$  (10-25% EtOAc/hexanes gradient). The product was further purified by HPLC and subsequently analyzed via chiral HPLC column [Regis (*S,S*)-Whelk, 5% IPA/hexanes, 1 mL/min,  $\lambda=254$  nm,  $t(\text{major}) = 18.56$  min,  $t(\text{minor}) = 16.98$  min] revealing 76% enantiomeric excess.

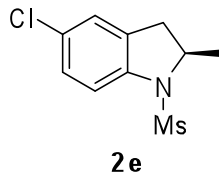

**(R)-5-Chloro-2-methyl-1-(methylsulfonyl)indoline (2e)**

Hydroamination adduct **2e** (33 mg, 66%) was obtained using the same procedure as for **2b**. Compound **2e** was obtained as a colorless oil.  $[\alpha]_D^{21} = -12.9$  ( $c$  0.13,  $\text{CHCl}_3$ );  $^1\text{H NMR}$  (500 MHz,  $\text{CDCl}_3$ )  $\delta$  7.35 (d,  $J=5.0$  Hz, 1H), 7.18-7.16 (m, 1H), 4.47-4.45 (m, 1H), 3.46-3.41 (m, 1H), 2.84 (s, 1H), 2.68 (dd,  $J=13.0, 3.0$  Hz, 1H), 1.45 (s, 3H);  $^{13}\text{C NMR}$  (75.5 MHz,  $\text{CDCl}_3$ )  $\delta$  128.0, 125.7, 116.2, 59.2, 36.4, 36.3, 23.3; IR (neat, thin film)  $\nu$  2926, 1474, 1347, 1247, 1160, 1013, 961  $\text{cm}^{-1}$ ; HRMS (ESI) calcd for  $[\text{M}]^+$   $\text{C}_{10}\text{H}_{12}\text{O}_2\text{N}_1\text{Cl}_1\text{Na}_1\text{S}_1$ : 268.0169, found 268.0174.

Hydroamination adduct **2e** was purified by flash chromatography on  $\text{SiO}_2$  (2-20% EtOAc/hexanes gradient). The product was further purified by HPLC and subsequently analyzed via chiral HPLC column [Regis (*S,S*)-Whelk, 5% IPA/hexanes, 1 mL/min,  $\lambda=254$  nm,  $t(\text{major}) = 18.29$  min,  $t(\text{minor}) = 16.14$  min] revealing 73% enantiomeric excess.

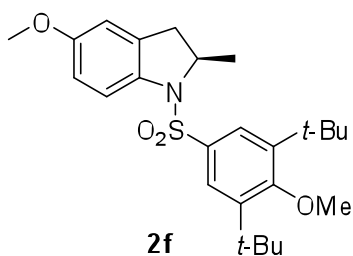

**(R)-1-(3,5-Di-tert-butyl-4-methoxyphenylsulfonyl)-5-methoxy-2-methylindoline (2f)**

Hydroamination adduct **2f** (36.1 mg, 72%) was obtained using the same procedure as for **2b** except 20 mol% of Cu(OTf)<sub>2</sub>, 25 mol% of (*R,R*)-Ph-box, and 5 equiv of 1,4-cyclohexadiene were used and the reaction was run at 110 °C for 24 h. Compound **2f** was obtained as a colorless oil. The hydroamination to carboamination ratio was determined to be 73:27 based on integration of the hydrogen peak at 4.25 ppm at the 2-position of the hydroamination product and the hydrogen peak at 4.88 ppm at the 11a-position of the carboamination product in the crude <sup>1</sup>H NMR. Data for **2f**: [ $\alpha$ ]<sub>D</sub><sup>23</sup> = +145.8 (*c* 0.49, CHCl<sub>3</sub>); <sup>1</sup>H NMR (400 MHz, CDCl<sub>3</sub>)  $\delta$  7.59 (d, *J*=8.4 Hz, 1H), 7.42 (s, 2H), 6.78 (d, *J*=8.8 Hz, 1H), 6.58 (s, 1H), 4.27-4.23 (m, 1H), 3.74 (s, 3H), 3.63 (s, 3H), 2.54-2.48 (m, 1H), 2.27 (dd, *J*=13.6, 1.6 Hz, 1H), 1.36 (d, *J*=6.8 Hz, 3H), 1.27 (s, 18H); <sup>13</sup>C NMR (75.5 MHz, CDCl<sub>3</sub>)  $\delta$  163.4, 157.7, 144.8, 134.7, 134.4, 131.3, 125.6, 119.4, 112.9, 110.9, 64.6, 58.8, 55.7, 36.2, 36.0, 31.6, 23.0; IR (neat, thin film)  $\nu$  2963, 1607, 1486, 1405, 1350, 1260, 1227, 1201, 1169, 1128, 1033, 1003, 886 cm<sup>-1</sup>; HRMS (ESI) calcd for [M]<sup>+</sup> C<sub>25</sub>H<sub>35</sub>O<sub>4</sub>N<sub>1</sub>S<sub>1</sub>: 445.2281, found 445.2282.

Hydroamination adduct **2f** was purified by flash chromatography on SiO<sub>2</sub> (10-25% EtOAc/hexanes gradient). The product was further purified by HPLC and subsequently analyzed via chiral HPLC column [Regis (*S,S*)-Whelk, 1% IPA/hexanes, 0.7 mL/min,  $\lambda$ =254 nm, *t*(major) = 31.10 min, *t*(minor) = 28.81 min] revealing 84% enantiomeric excess.

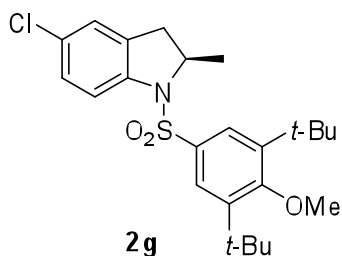

**(R)-5-Chloro-1-(3,5-di-tert-butyl-4-methoxyphenylsulfonyl)-2-methylindoline (2g)**

Hydroamination adduct **2g** (33.8 mg, 68%) was obtained using the same procedure as for **2b** except 20 mol% of Cu(OTf)<sub>2</sub>, 25 mol% of (*R,R*)-Ph-box, and the reaction was run at 110 °C for 24 h. Compound **2g** was obtained as a white solid. The hydroamination to carboamination ratio was determined to be 74:26 based on the integrations of the hydrogen peak at 4.29 ppm at the 2-position of the hydroamination product and the hydrogen peak at 4.90 ppm at the 11a-position of

the carboamination product in the crude  $^1\text{H}$  NMR. Data for **2g**: mp 129-132 °C;  $[\alpha]_{\text{D}}^{18} = +201.7$  ( $c$  0.05,  $\text{CHCl}_3$ );  $^1\text{H}$  NMR (400 MHz,  $\text{CDCl}_3$ )  $\delta$  7.61 (d,  $J=8.8$  Hz, 1H), 7.46 (s, 2H), 7.20 (d,  $J=6.0$  Hz, 1H), 7.02 (s, 1H), 4.32-4.27 (m, 1H), 3.64 (s, 3H), 2.70-2.64 (m, 1H), 2.37 (dd,  $J=13.6, 2.4$  Hz, 1H), 1.4 (d,  $J=6.4$  Hz, 3H), 1.29 (s, 18H);  $^{13}\text{C}$  NMR (75.5 MHz,  $\text{CDCl}_3$ )  $\delta$  163.6, 145.1, 140.2, 134.2, 131.5, 130.1, 127.7, 125.4, 125.2, 118.9, 64.6, 58.8, 36.0, 35.9, 31.6, 23.2; IR (neat, thin film)  $\nu$  2962, 1746, 1471, 1406, 1359, 1260, 1170, 1114, 881  $\text{cm}^{-1}$ ; HRMS (ESI) calcd for  $[\text{M}]^+ \text{C}_{24}\text{H}_{32}\text{O}_3\text{N}_1\text{Cl}_1\text{S}_1$ : 449.1786, found 449.1783.

Hydroamination adduct **2g** was purified by flash chromatography on  $\text{SiO}_2$  (10-25% EtOAc/hexanes gradient). The product was further purified by HPLC and subsequently analyzed via chiral HPLC column [Regis (*S,S*)-Whelk, 1% IPA/hexanes, 1 mL/min,  $\lambda=254$  nm,  $t(\text{major}) = 12.91$  min,  $t(\text{minor}) = 11.14$  min] revealing 89% enantiomeric excess.

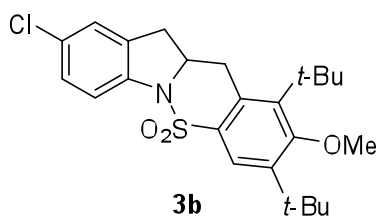

### 1,3-Di-*tert*-butyl-9-chloro-11a,12-dihydro-2-methoxy-5,5-dioxide-11*H*-Indolo[1,2-*b*][1,2]benzothiazine **3b**

Carboamination adduct **3b** (10.1 mg, 20%) was obtained as a colorless oil from the same reaction as **2g**. Data for **3b**:  $^1\text{H}$  NMR (400 MHz,  $\text{CDCl}_3$ )  $\delta$  7.67 (s, 1H), 7.39 (d,  $J=8.0$  Hz, 1H), 7.14 (d,  $J=8.5$  Hz, 1H), 7.04 (s, 1H), 4.96-4.82 (m, 1H), 3.96-3.82 (m, 1H), 3.67 (d,  $J=12.8$  Hz, 1H), 3.56 (s, 3H), 3.11-2.99 (m, 1H), 2.92-2.79 (m, 1H), 1.55 (s, 9H), 1.35 (s, 9H);  $^{13}\text{C}$  NMR (75.5 MHz,  $\text{CDCl}_3$ )  $\delta$  164.4, 143.3, 133.5, 129.9, 127.8, 124.6, 121.8, 64.9, 62.1, 37.3, 35.8, 32.7, 30.9, 22.7, 14.1; IR (neat, thin film)  $\nu$  2963, 1650, 1540, 1472, 1342, 1232, 1163, 1121, 1042, 910  $\text{cm}^{-1}$ ; HRMS (ESI) calcd for  $[\text{M}]^+ \text{C}_{24}\text{H}_{30}\text{O}_3\text{N}_1\text{Cl}_1\text{S}_1$ : 447.1629, found: 447.1630.

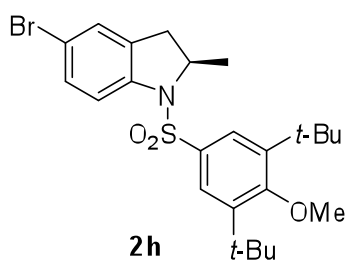

### (*R*)-5-Bromo-1-(3,5-di-*tert*-butyl-4-methoxyphenylsulfonyl)-2-methylindoline (**2h**)

Hydroamination adduct **2h** (31.1 mg, 62%) was obtained using the same procedure as for **2b** except 20 mol% of  $\text{Cu}(\text{OTf})_2$ , 25 mol% of (*R,R*)-Ph-box, and 5 equiv of 1,4-cyclohexadiene were

used and the reaction was run at 110 °C. Compound **2h** was obtained as a white solid. The hydroamination to carboamination ratio was determined to be 74:26 based on the integrations of the hydrogen peak at 4.29 ppm at the 2-position of the hydroamination product and the hydrogen peak at 4.90 ppm at the 11a-position of the carboamination product in the crude  $^1\text{H}$  NMR. Data for **2h**: mp 133-136 °C;  $[\alpha]_{\text{D}}^{22} = +74.1$  ( $c$  0.13,  $\text{CHCl}_3$ );  $^1\text{H}$  NMR (400 MHz,  $\text{CDCl}_3$ )  $\delta$  7.55 (d,  $J=8.4$  Hz, 1H), 7.47 (s, 2H), 7.35 (d,  $J=8.4$  Hz, 1H), 7.17 (s, 1H), 4.30-4.27 (m, 1H), 3.64 (s, 3H), 2.72-2.66 (m, 1H), 2.37 (dd,  $J=14.0, 2.0$  Hz, 3H), 1.40 (d,  $J=6.4$  Hz, 3H), 1.29 (s, 18H);  $^{13}\text{C}$  NMR (125.7 MHz,  $\text{CDCl}_3$ )  $\delta$  163.6, 145.1, 140.7, 134.6, 131.5, 130.6, 128.2, 125.4, 119.3, 117.6, 110.0, 64.6, 58.8, 36.0, 35.8, 31.6, 23.2; IR (neat, thin film)  $\nu$  2962, 1471, 1396, 1355, 1227, 1169, 1114, 816  $\text{cm}^{-1}$ ; HRMS (ESI) calcd for  $[\text{M}]^+$   $\text{C}_{24}\text{H}_{32}\text{O}_3\text{N}_1\text{Br}_1\text{S}_1$ : 493.1281, found 493.1271.

Hydroamination adduct **2h** was purified by flash chromatography on  $\text{SiO}_2$  (10-25% EtOAc/hexanes gradient). The product was further purified by HPLC and subsequently analyzed via chiral HPLC column [Regis (*S,S*)-Whelk, 1% IPA/hexanes, 1 mL/min,  $\lambda=254$  nm,  $t(\text{major}) = 11.85$  min,  $t(\text{minor}) = 10.47$  min] revealing 86% enantiomeric excess.

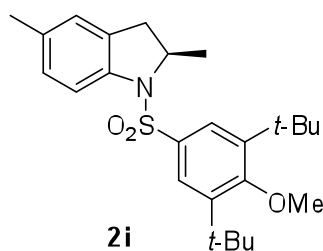

### **(*R*)-1-(3,5-Di-*tert*-butyl-4-methoxyphenylsulfonyl)-2,5-dimethylindoline (**2i**)**

Hydroamination adduct **2i** (35.1 mg, 70%) was obtained using the same procedure as for **2b** except 20 mol% of  $\text{Cu}(\text{OTf})_2$ , 25 mol% of (*R,R*)-Ph-box, and 5 equiv of 1,4-cyclohexadiene were used and the reaction was run at 110 °C. Compound **2i** was obtained as a white solid. The hydroamination to carboamination ratio was determined to be 93:7 based on the integrations of the hydrogen peak at 4.25 ppm at the 2-position of the hydroamination product and the hydrogen peak at 4.87 ppm at the 11a-position of the carboamination product in the crude  $^1\text{H}$  NMR. Data for **2i**: mp 122-125 °C;  $[\alpha]_{\text{D}}^{21} = +142.1$  ( $c$  0.34,  $\text{CHCl}_3$ );  $^1\text{H}$  NMR (500 MHz,  $\text{CDCl}_3$ )  $\delta$  7.56 (d,  $J=8.5$  Hz, 1H), 7.44 (s, 2H), 7.03 (d,  $J=8.0$  Hz, 1H), 6.84 (s, 1H), 4.27-4.24 (m, 1H), 3.62 (s, 3H), 2.60-2.55 (m, 1H), 2.29 (dd,  $J=14.5, 2.0$  Hz, 3H), 2.26 (s, 3H), 1.37 (d,  $J=7.0$  Hz, 3H), 1.27 (s, 18H);  $^{13}\text{C}$  NMR (125.7 MHz,  $\text{CDCl}_3$ )  $\delta$  163.4, 144.8, 139.1, 134.8, 132.7, 131.6, 128.3, 125.6, 125.5, 118.2, 118.1, 64.7, 64.6, 58.6, 36.0, 31.7, 31.6, 31.5, 23.2, 20.9; IR (neat, thin film)  $\nu$  2963, 1487, 1405, 1352, 1255, 1227, 1169, 1128, 1005, 886  $\text{cm}^{-1}$ ; HRMS (ESI) calcd for  $[\text{M}]^+$   $\text{C}_{25}\text{H}_{35}\text{O}_3\text{N}_1\text{S}_1$ : 429.2332, found 429.2335.

Hydroamination adduct **2i** was purified by flash chromatography on  $\text{SiO}_2$  (10-25% EtOAc/hexanes gradient). The product was further purified by HPLC and subsequently analyzed

via chiral HPLC column [Regis (*S,S*)-Whelk, 3% IPA/hexanes, 0.5 mL/min,  $\lambda=254$  nm,  $t(\text{major}) = 20.92$  min,  $t(\text{minor}) = 19.52$  min] revealing 88% enantiomeric excess.

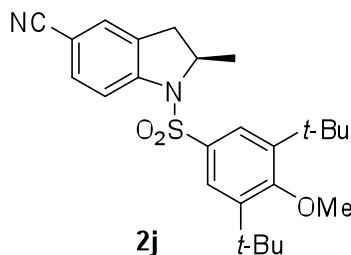

**(*R*)-1-(3,5-Di-*tert*-butyl-4-methoxyphenylsulfonyl)-2-methylindoline-5-carbonitrile (2j)**

Hydroamination adduct **2j** (28.4 mg, 57%) was obtained using the same procedure as for **2b** except 20 mol% of  $\text{Cu}(\text{OTf})_2$ , 25 mol% of (*R,R*)-Ph-box, and 5 equiv of 1,4-cyclohexadiene were used and the reaction was run at 110 °C. Compound **2j** was obtained as a white solid. The hydroamination to carboamination ratio was determined to be 65:35 based on the integration of the hydrogen peak at 4.37 ppm at the 2-position of the hydroamination product and the hydrogen peak at 4.93 ppm at the 11a-position of the carboamination product in the crude  $^1\text{H}$  NMR. Data for **2j**: mp 142-145 °C;  $[\alpha]_{\text{D}}^{19} = +90.2$  ( $c$  0.28,  $\text{CHCl}_3$ );  $^1\text{H}$  NMR (500 MHz,  $\text{CDCl}_3$ )  $\delta$  7.73 (d,  $J=8.4$  Hz, 1H), 7.54-7.52 (m, 3H), 7.34 (s, 1H), 4.39-4.34 (m, 1H), 3.66 (s, 3H), 2.97-2.91 (m, 1H), 2.54 (dd,  $J=13.2, 3.2$  Hz, 1H), 1.46 (d,  $J=6.8$  Hz, 3H), 1.31 (s, 18H);  $^{13}\text{C}$  NMR (75.5 MHz,  $\text{CDCl}_3$ )  $\delta$  163.9, 145.6, 145.4, 132.6, 132.5, 131.8, 128.9, 125.3, 116.9, 107.3, 64.6, 59.0, 36.1, 35.8, 31.6, 23.4; IR (neat, thin film)  $\nu$  2965, 2227, 1608, 1483, 1406, 1359, 1259, 1170, 1109, 886  $\text{cm}^{-1}$ ; HRMS (ESI) calcd for  $[\text{M}]^+$   $\text{C}_{25}\text{H}_{32}\text{O}_3\text{N}_2\text{S}_1$ : 440.2128, found 440.2133.

Hydroamination adduct **2j** was purified by flash chromatography on  $\text{SiO}_2$  (10-25% EtOAc/hexanes gradient). The product was further purified by HPLC, however the enantiomers were not able to be separated on several chiral HPLC columns.

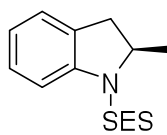

**(*R*)-2-Methyl-1-(2-(trimethylsilyl)ethylsulfonyl)indoline (2k)**

Hydroamination adduct **2k** (32.2 mg, 64%) was obtained using the same procedure as for **2b** except 20 mol% of  $\text{Cu}(\text{OTf})_2$ , 25 mol% of (*R,R*)-Ph-box, and the reaction was run at 110 °C. Compound **2k** was obtained as a colorless oil.  $[\alpha]_{\text{D}}^{22} = +21.1$  ( $c$  0.10,  $\text{CHCl}_3$ );  $^1\text{H}$  NMR (400 MHz,  $\text{CDCl}_3$ )  $\delta$  7.36 (d,  $J=7.6$  Hz, 1H), 7.20-7.16 (m, 2H), 7.01 (t,  $J=14.0$  Hz, 1H), 4.55-4.51 (m, 1H), 3.48-3.42 (m, 1H), 2.98-2.91 (m, 2H), 2.69 (dd,  $J=13.2, 2.8$  Hz, 1H), 1.43 (d,  $J=6.0$  Hz, 3H), 1.06-1.02 (m, 1H), 0.96-0.92 (m, 1H), -0.03 (s, 9H);  $^{13}\text{C}$  NMR (75.5 MHz,  $\text{CDCl}_3$ )  $\delta$  141.2,

130.2, 127.9, 125.5, 123.5, 114.6, 59.0, 46.8, 36.5, 23.6, 9.9, -2.1; IR (neat, thin film)  $\nu$  2955, 1603, 1479, 1460, 1346, 1251, 1149, 1104, 1022, 938  $\text{cm}^{-1}$ ; HRMS (ESI) calcd for  $[\text{M} + \text{Na}]^+$   $\text{C}_{14}\text{H}_{23}\text{O}_2\text{N}_1\text{Na}_1\text{S}_1\text{Si}_1$ : 320.1111, found: 320.1102.

Hydroamination adduct **2k** was purified by flash chromatography on  $\text{SiO}_2$  (10-25% EtOAc/hexanes gradient). The product was further purified by HPLC and subsequently analyzed via chiral HPLC column [Regis (*S,S*)-Whelk, 3% IPA/hexanes, 1 mL/min,  $\lambda=254$  nm,  $t(\text{major}) = 11.07$  min,  $t(\text{minor}) = 10.36$  min] revealing 72% enantiomeric excess.

### (*R*)-2-Methylindoline (**4**)

(*R*)-*N*-Mesyl-2-methylindoline **2b** (0.0335 g, 0.159 mmol, 77% ee) in xylenes (0.8 mL) was treated with a solution of Red-Al in toluene (0.16 mL of a 3.5 M solution, 3.6 equiv) under Ar.<sup>9</sup> The resulting solution was equipped with a condenser and heated at reflux under Ar (ca. 140 °C) for 1 h. The reaction was then cooled to 0 °C, diluted with  $\text{Et}_2\text{O}$  and quenched with a few drops of  $\text{H}_2\text{O}$ . The mixture was filtered through Celite with  $\text{Et}_2\text{O}$  and the filtrate was concentrated in vacuo. Purification by flash chromatography on  $\text{SiO}_2$  (2-20% EtOAc in hexanes gradient) afforded 14.4 mg (68%) of (*R*)-2-methylindoline (**4**), whose  $^1\text{H}$  NMR spectrum was identical to that of the commercially available racemate.  $[\alpha]_{\text{D}}^{18} = +10$  ( $c$  0.08, PhH); lit. for (*S*)-2-methylindoline:  $[\alpha]_{\text{D}}^{23} = -11$  ( $c$  0.11, PhH).<sup>10</sup>

### References

- (1) Bovino, M. T.; Chemler, S. R. *Angew. Chem. Int. Ed.* **2012**, *51*, 3923-3927.
- (2) Liwosz, T. W.; Chemler, S. R. *J. Am. Chem. Soc.* **2012**, *134*, 2020-2023.
- (3) Sequeira, F. C.; Bovino, M. T.; Chipre, A. J.; Chemler, S. R. *Synthesis* **2012**, *44*, 1481-1484.
- (4) Fuller, P. H.; Kim, J.-W.; Chemler, S. R. *J. Am. Chem. Soc.* **2008**, *130*, 17638-17639.
- (5) Mase, N.; Watanabe, Y.; Ueno, Y.; Toru, T. *J. Org. Chem.* **1997**, *62*, 7794-7800.
- (6) Inada, S.; Hirabayashi, S.; Taguchi, K.; Okazaki, M. *Nippon Kagaku Kaishi* **1978**, *1978*, 86-92.
- (7) Yin, Y.; Zhao, G. *J. Fluorine Chem* **2007**, *128*, 40-45.
- (8) Sherman, E. S.; Chemler, S. R.; Tan, T. B.; Gerlits, O. *Org. Lett.* **2004**, *6*, 1573-1575.
- (9) Mai, D. N.; Rosen, B. R.; Wolfe, J. P. *Org. Lett.* **2011**, *13*, 2932-2935.
- (10) Arp, F. O.; Fu, G. C. *J. Am. Chem. Soc.* **2006**, *128*, 14264-14265.

## HPLC Traces:

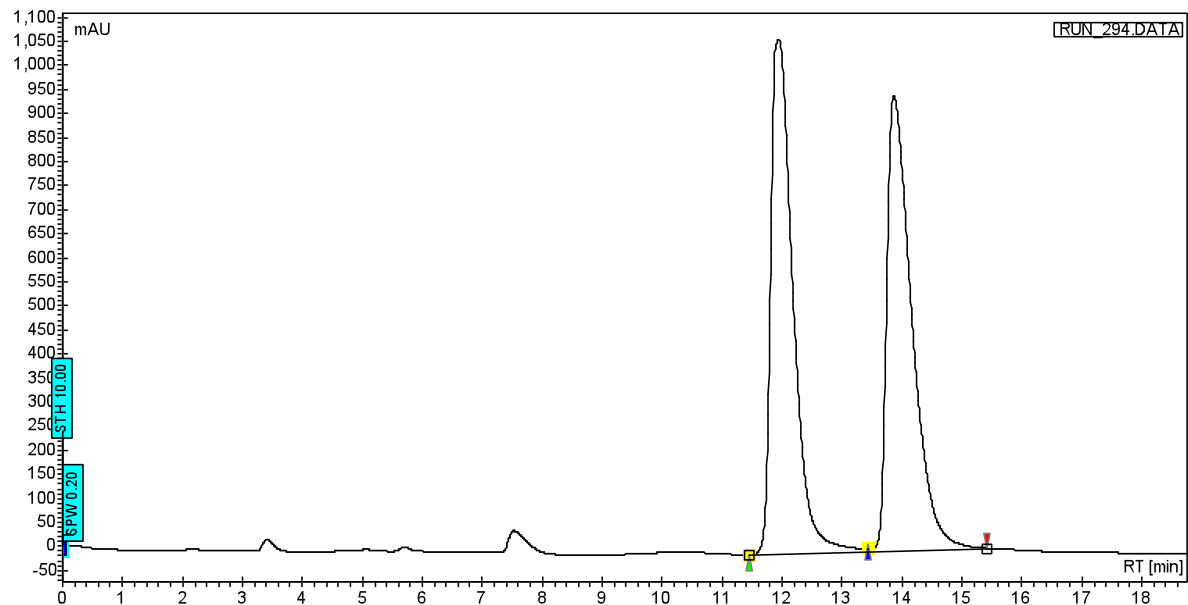

| # | Time[min] | Area[%] |
|---|-----------|---------|
| 1 | 11.94     | 50.08   |
| 2 | 13.85     | 49.92   |

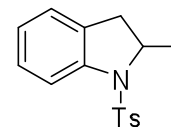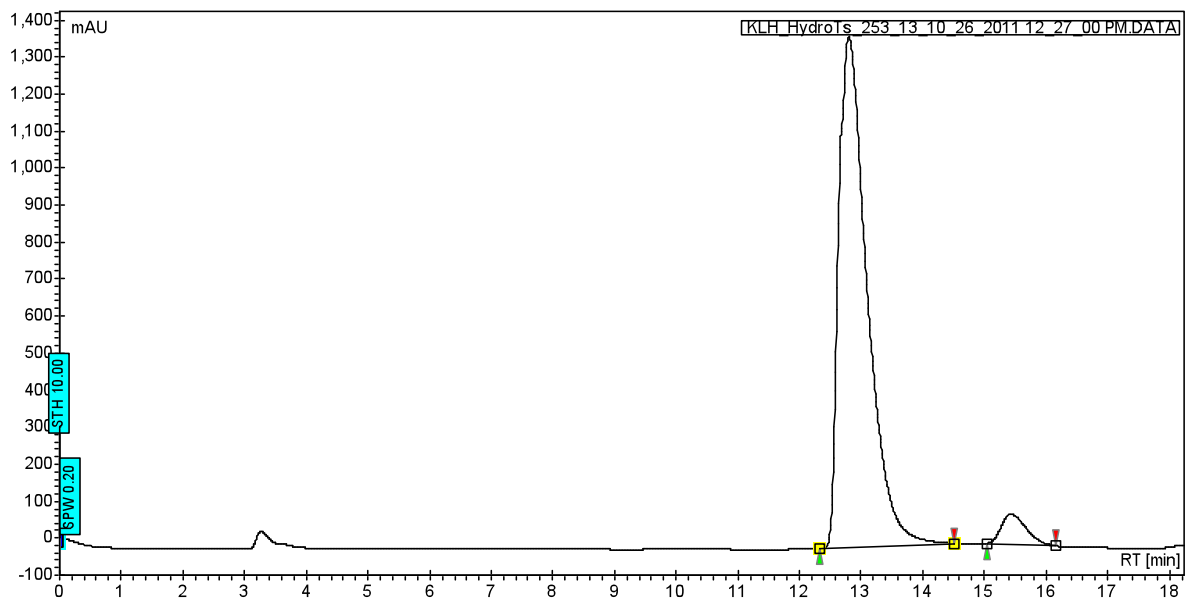

| # | Time[min] | Area[%] |
|---|-----------|---------|
| 1 | 12.80     | 95.08   |
| 2 | 15.43     | 4.92    |

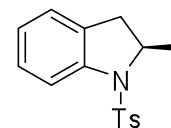

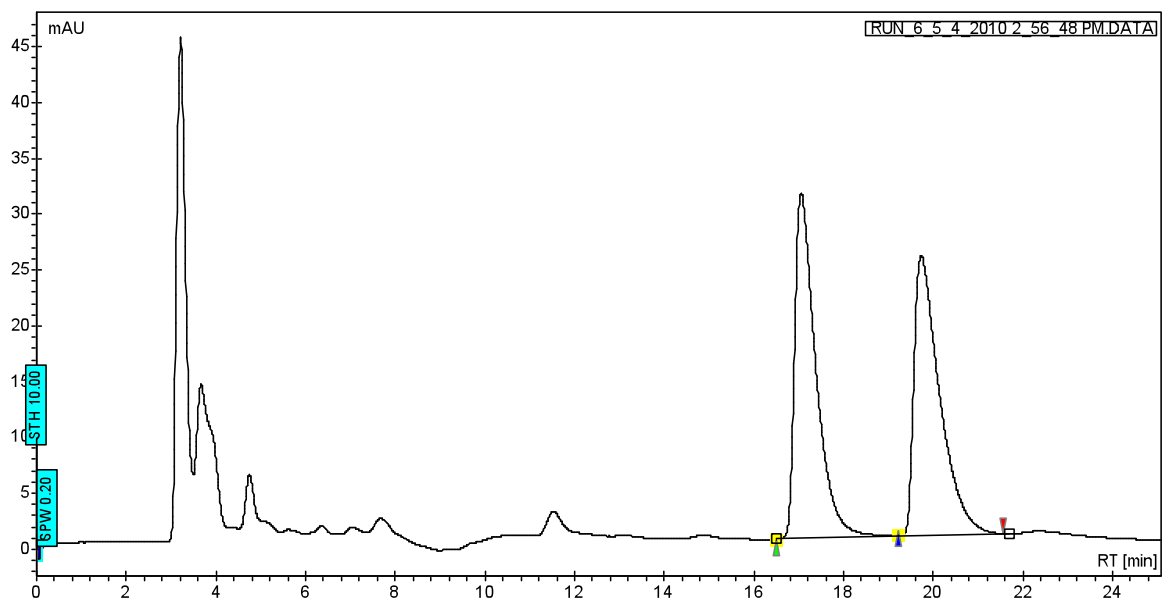

| # | Time[min] | Area[%] |
|---|-----------|---------|
| 1 | 17.05     | 50.39   |
| 2 | 19.74     | 49.61   |

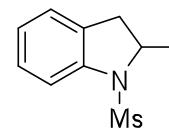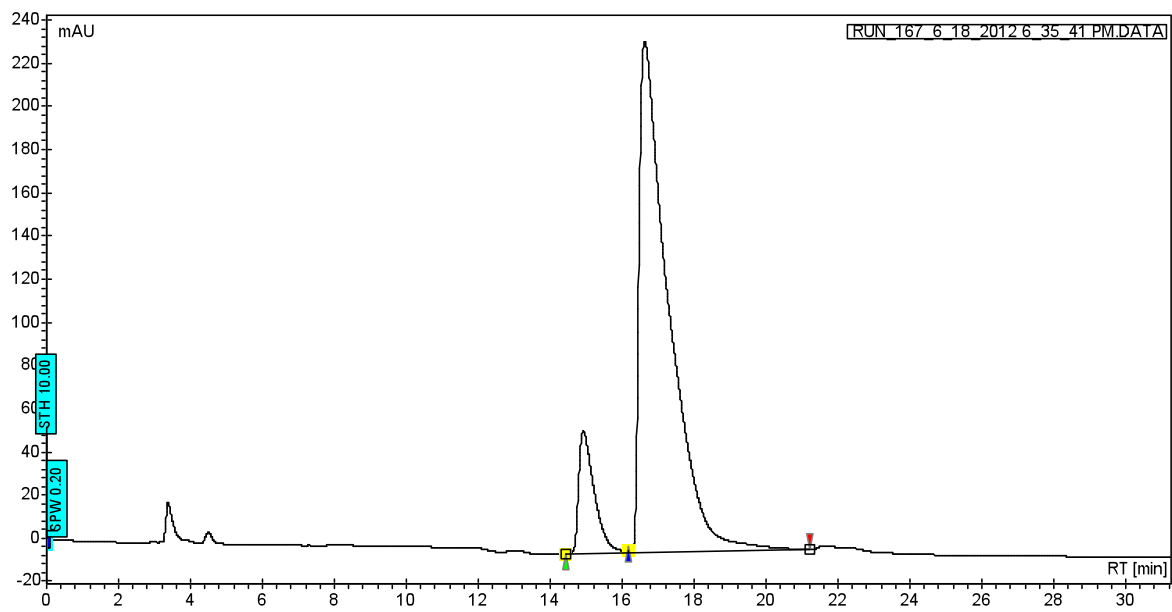

| # | Time[min] | Area[%] |
|---|-----------|---------|
| 1 | 14.93     | 11.40   |
| 2 | 16.63     | 88.60   |

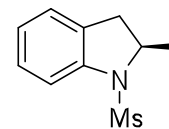



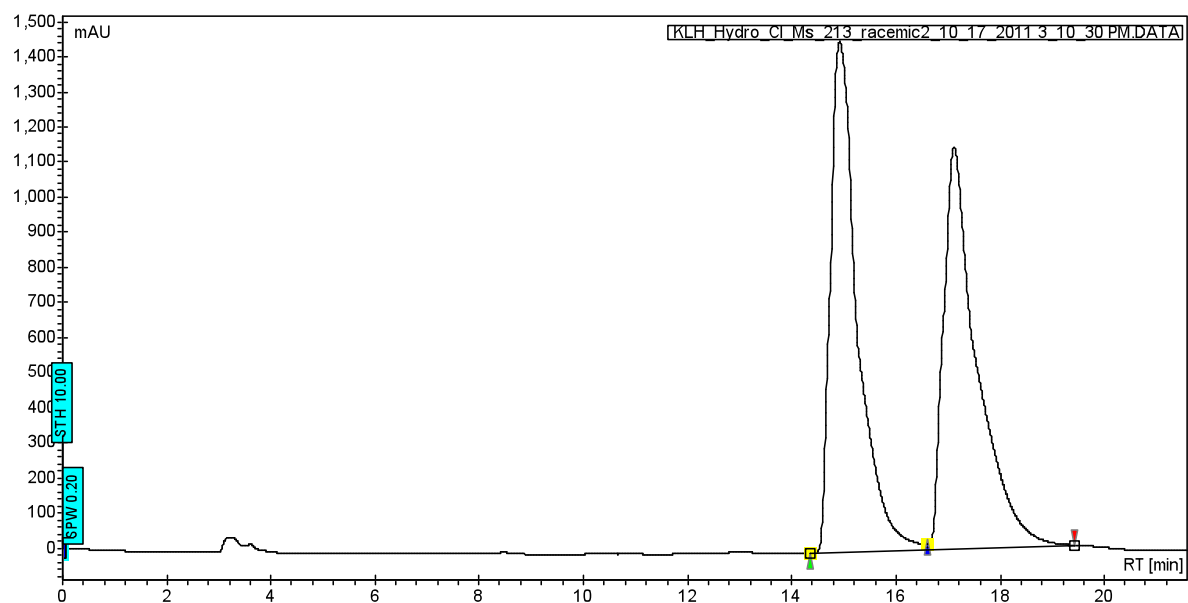

| # | Time[min] | Area[%] |
|---|-----------|---------|
| 1 | 14.92     | 50.78   |
| 2 | 17.11     | 49.22   |

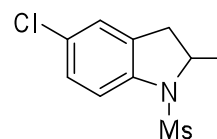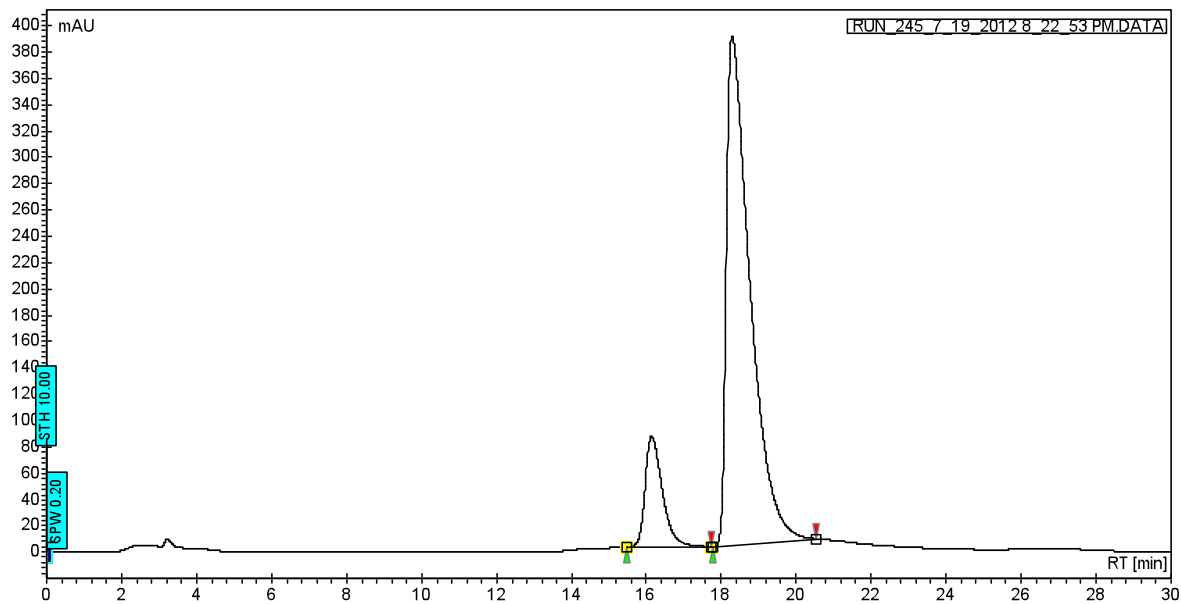

| # | Time[min] | Area[%] |
|---|-----------|---------|
| 1 | 16.14     | 13.77   |
| 2 | 18.29     | 86.23   |

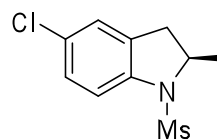

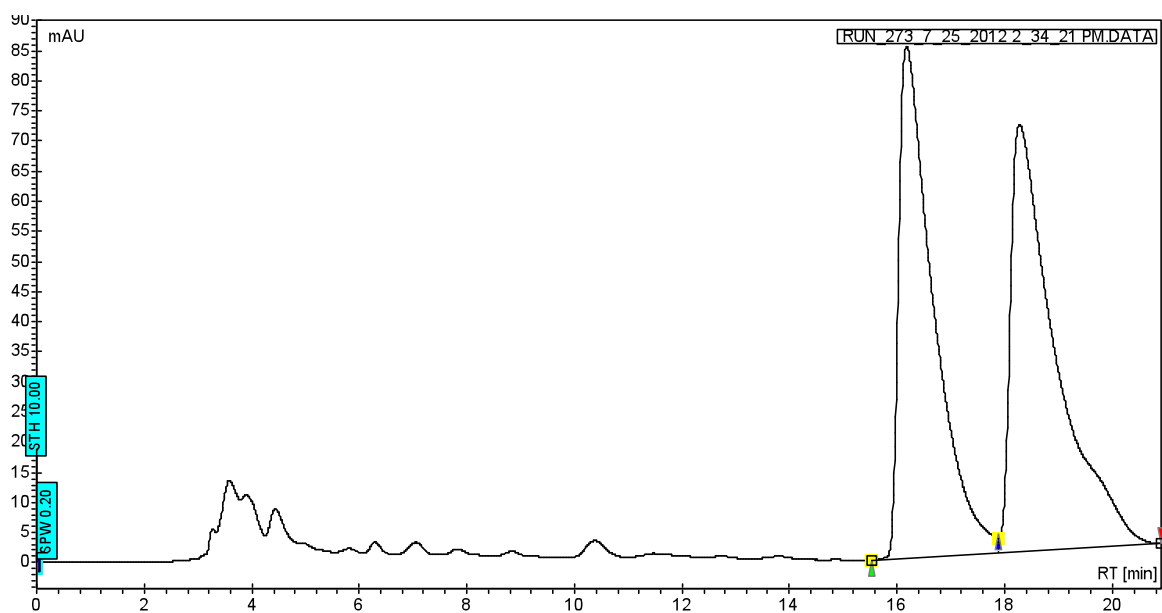

| # | Time[min] | Area[%] |
|---|-----------|---------|
| 1 | 16.17     | 48.09   |
| 2 | 18.27     | 51.91   |

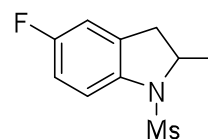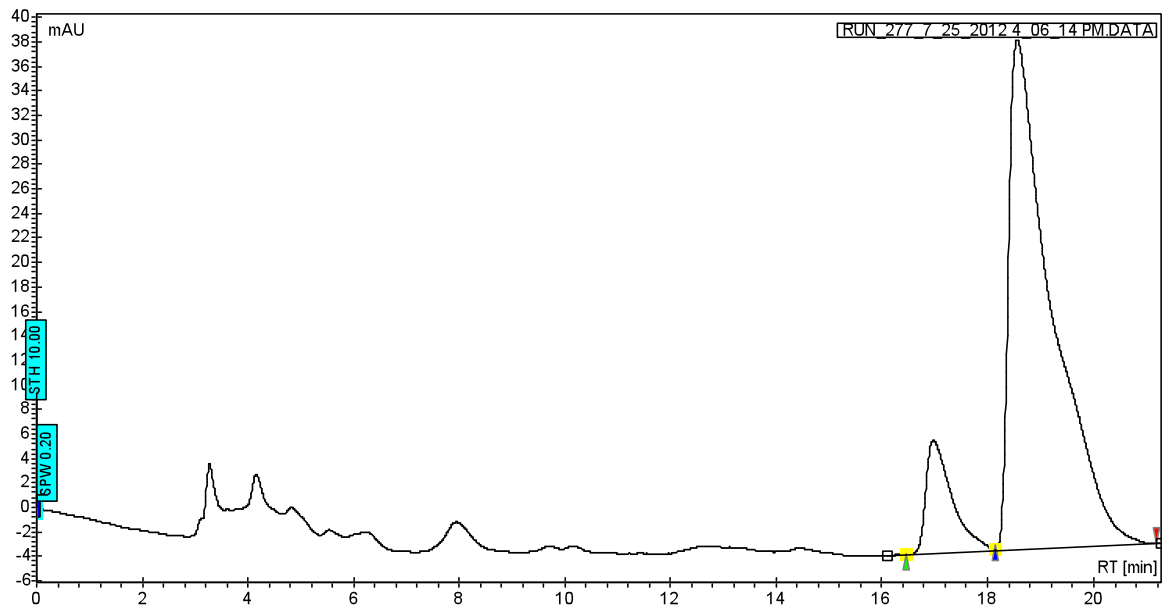

| # | Time[min] | Area[%] |
|---|-----------|---------|
| 1 | 16.98     | 12.05   |
| 2 | 18.56     | 87.95   |

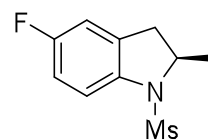

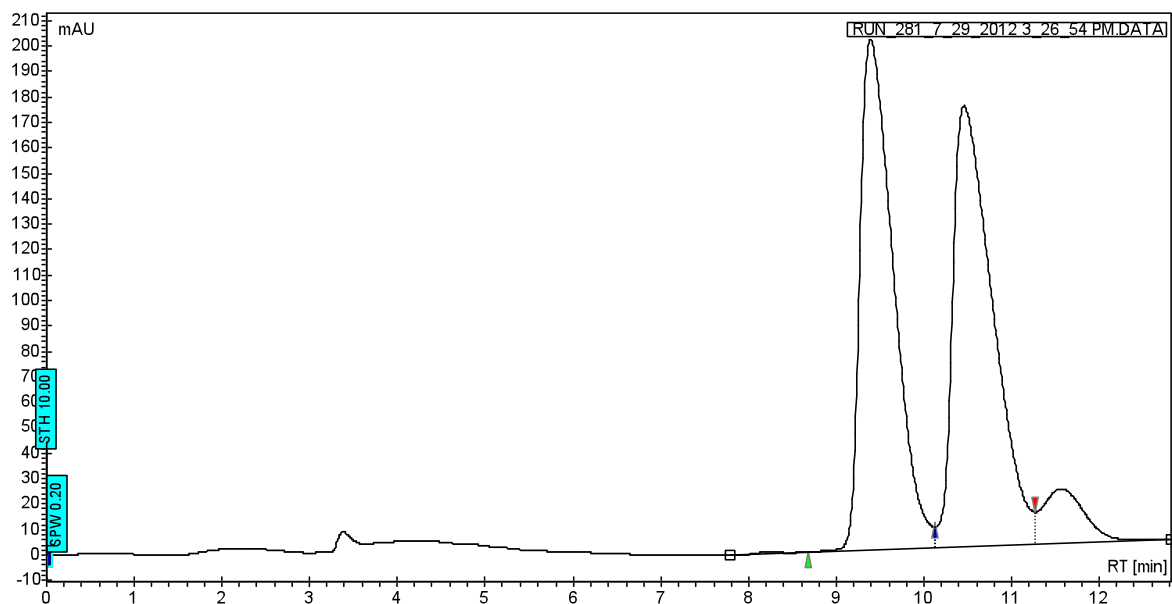

| # | Time[min] | Area[%] |
|---|-----------|---------|
| 1 | 9.39      | 49.20   |
| 2 | 10.46     | 50.80   |

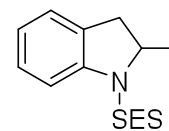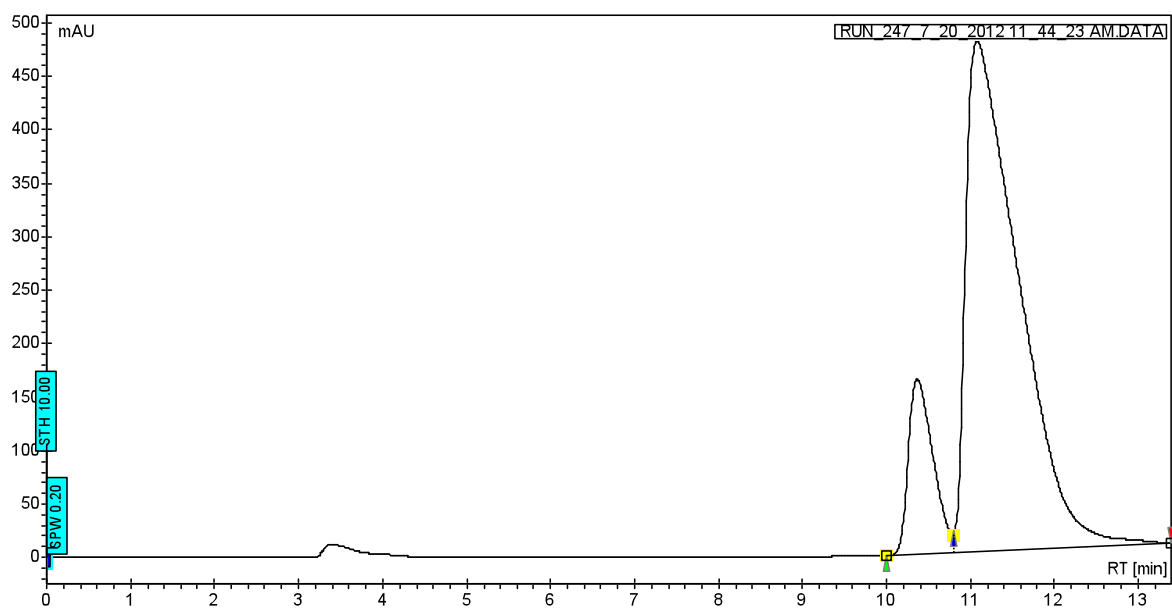

| # | Time[min] | Area[%] |
|---|-----------|---------|
| 1 | 10.36     | 13.87   |
| 2 | 11.07     | 86.13   |

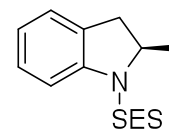

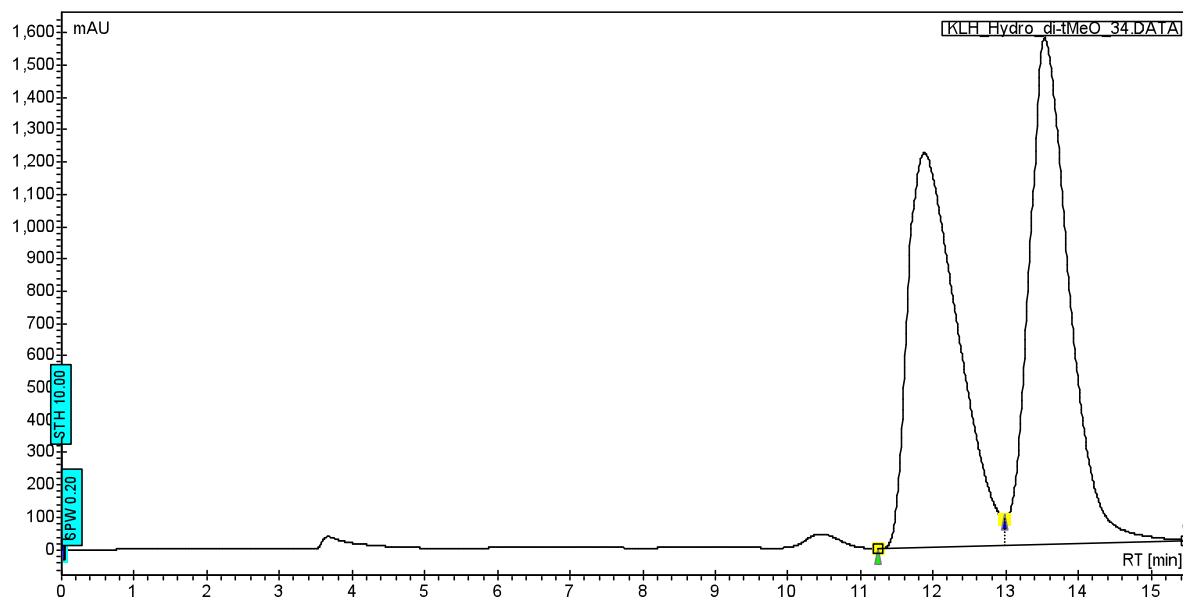

| # | Time [min] | Area [%] |
|---|------------|----------|
| 1 | 11.94      | 50.08    |
| 2 | 13.85      | 49.92    |

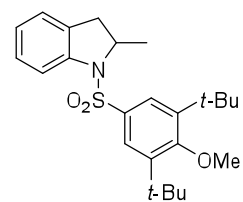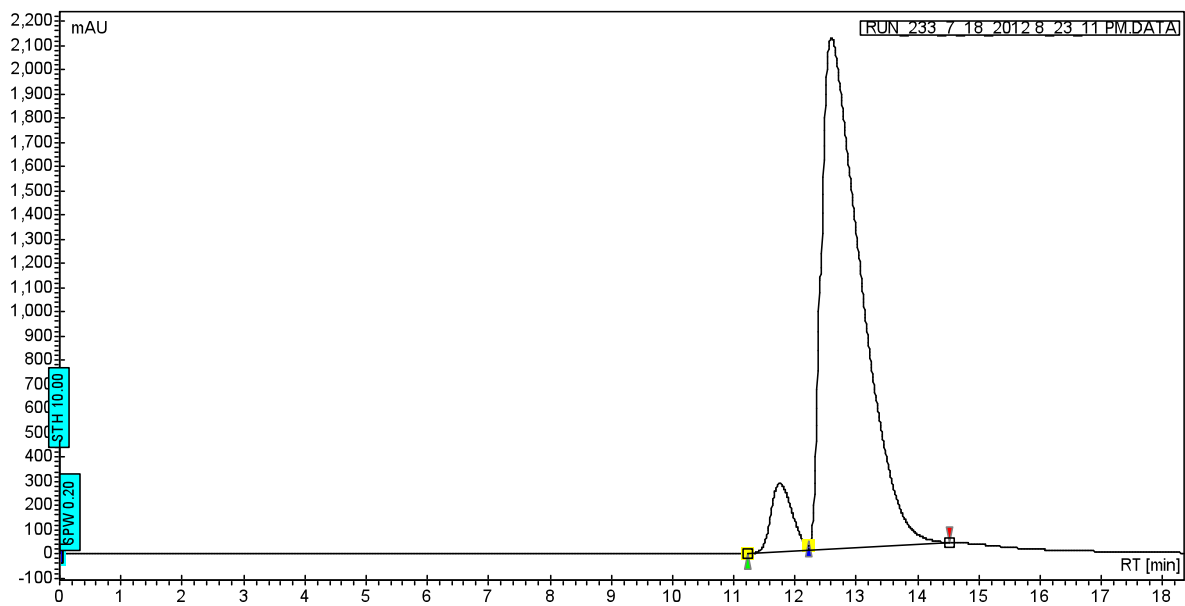

| # | Time [min] | Area [%] |
|---|------------|----------|
| 1 | 11.75      | 6.79     |
| 2 | 12.59      | 93.21    |

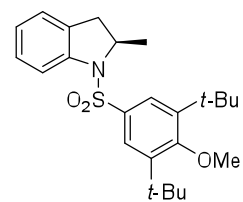

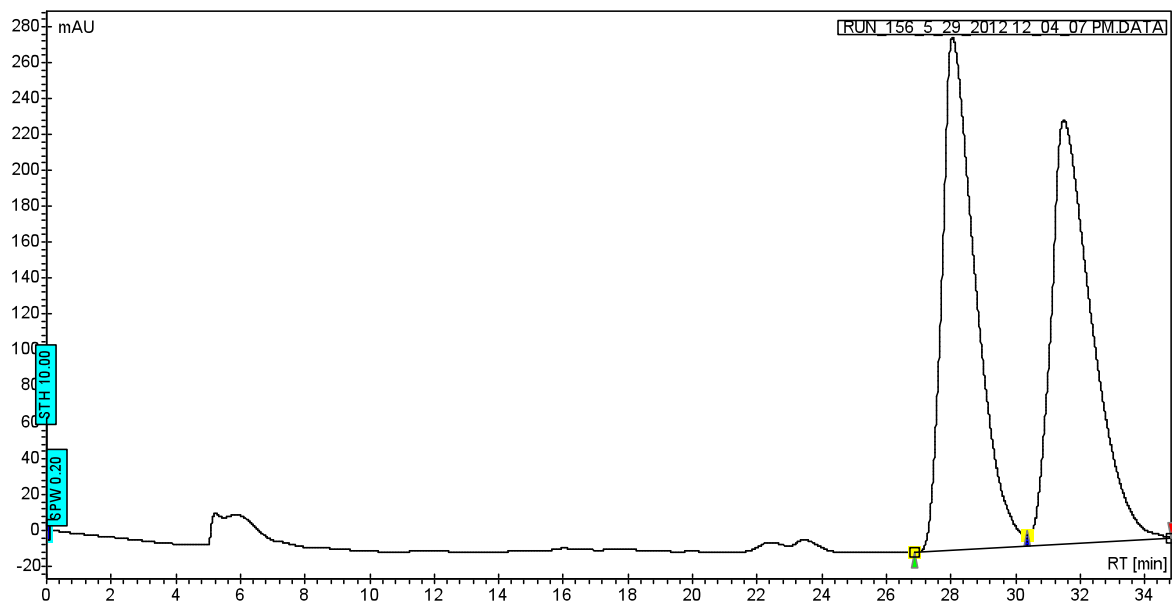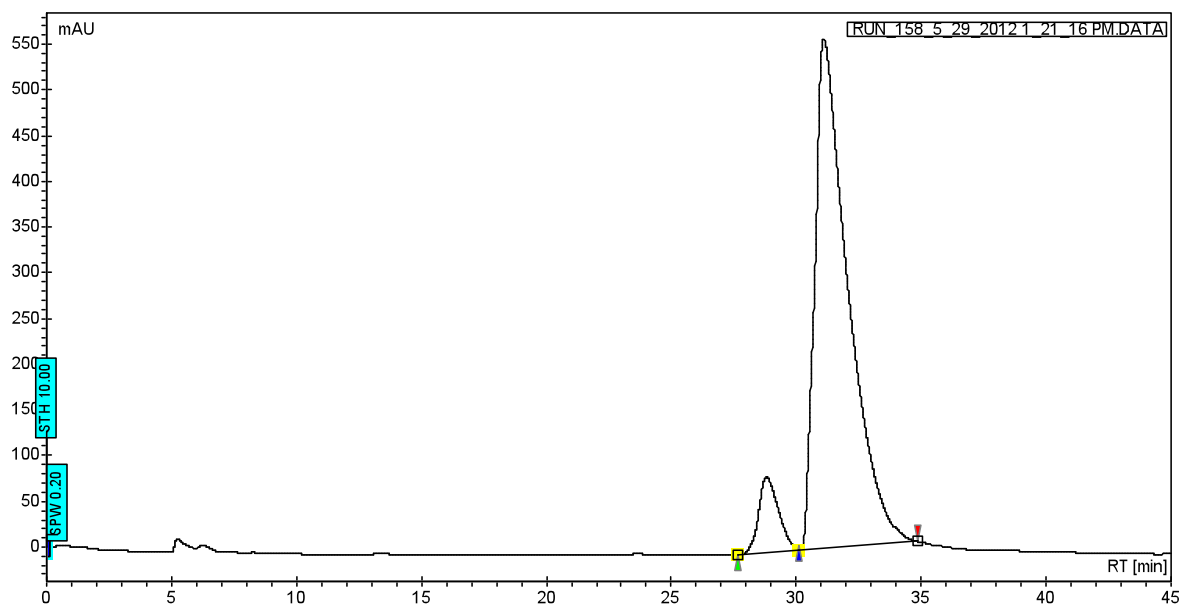

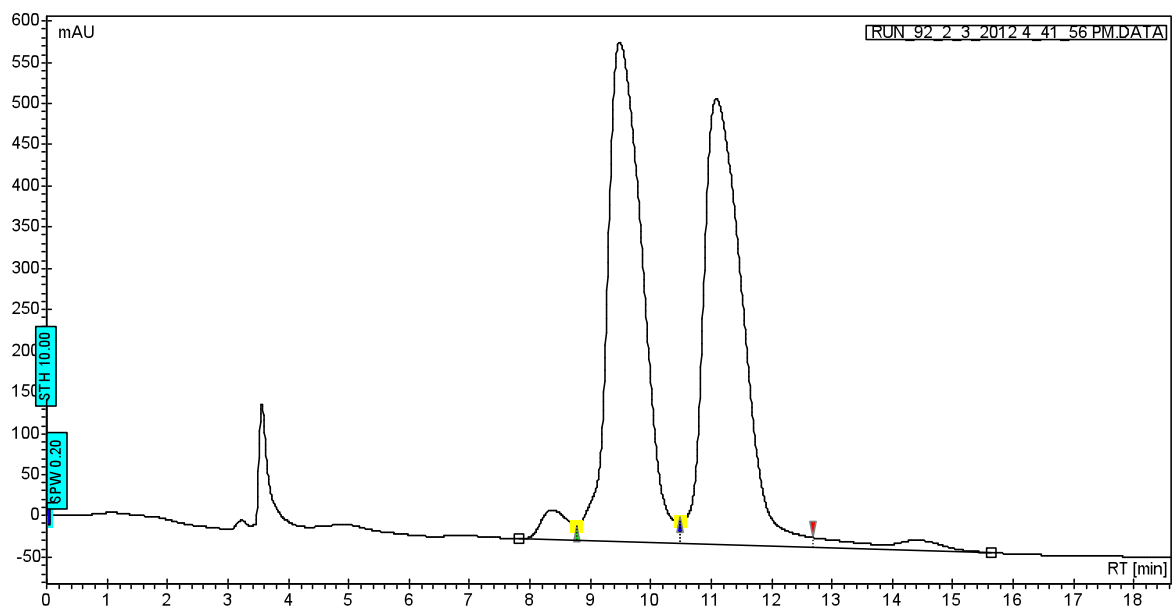

| # | Time[min] | Area[%] |
|---|-----------|---------|
| 1 | 9.49      | 50.05   |
| 2 | 11.09     | 49.95   |

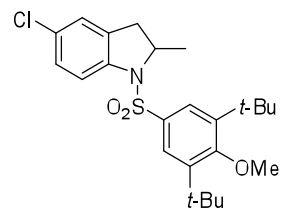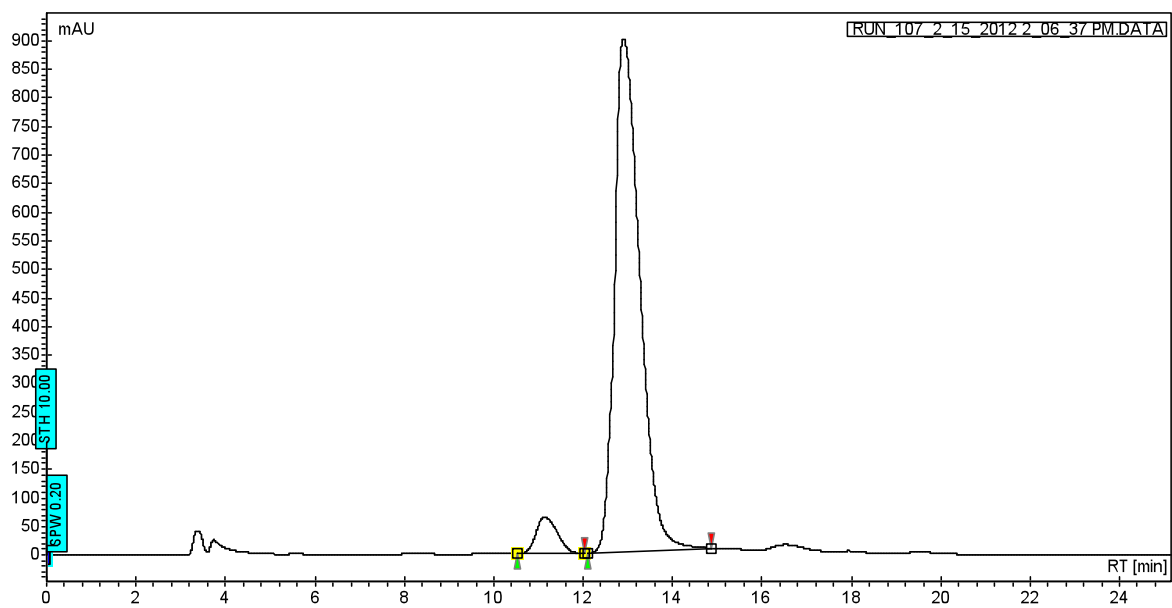

| # | Time[min] | Area[%] |
|---|-----------|---------|
| 1 | 11.14     | 5.69    |
| 2 | 12.91     | 94.31   |

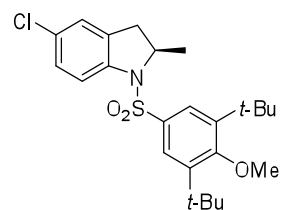

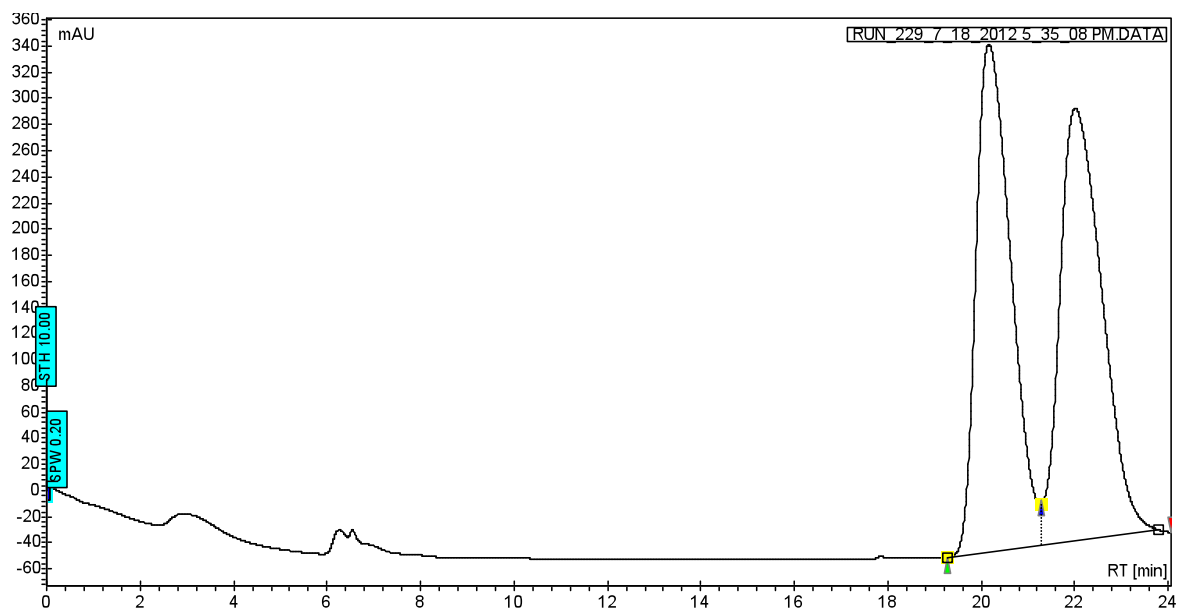

| # | Time[min] | Area[%] |
|---|-----------|---------|
| 1 | 20.16     | 49.20   |
| 2 | 22.01     | 50.80   |

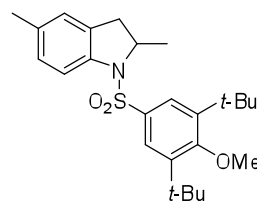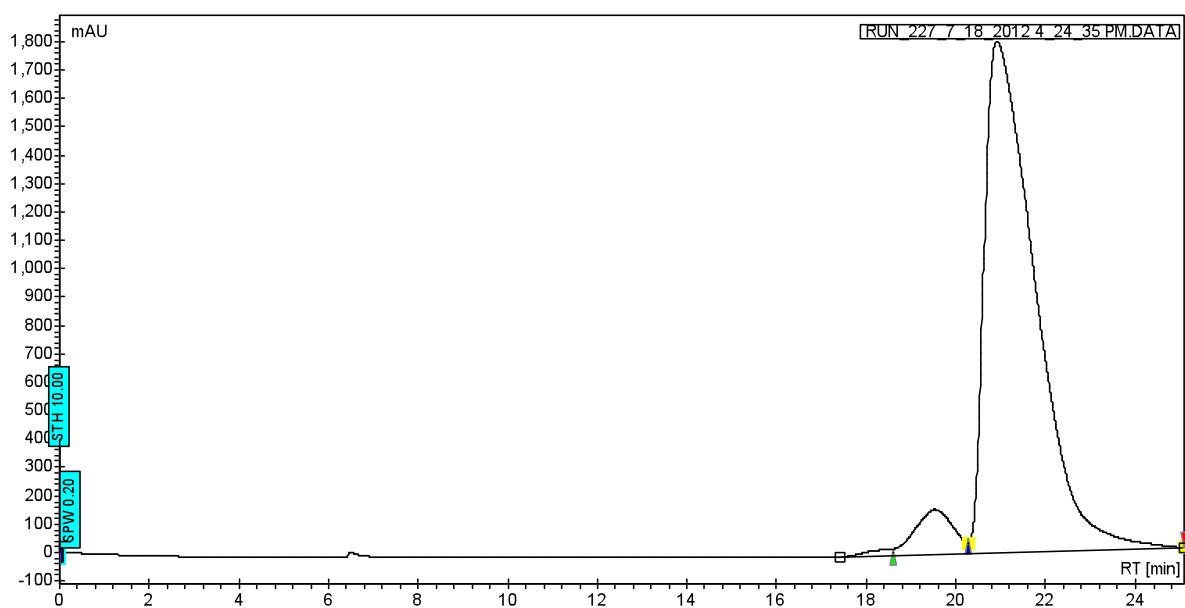

| # | Time[min] | Area[%] |
|---|-----------|---------|
| 1 | 19.52     | 6.27    |
| 2 | 20.92     | 93.73   |

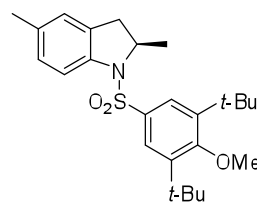

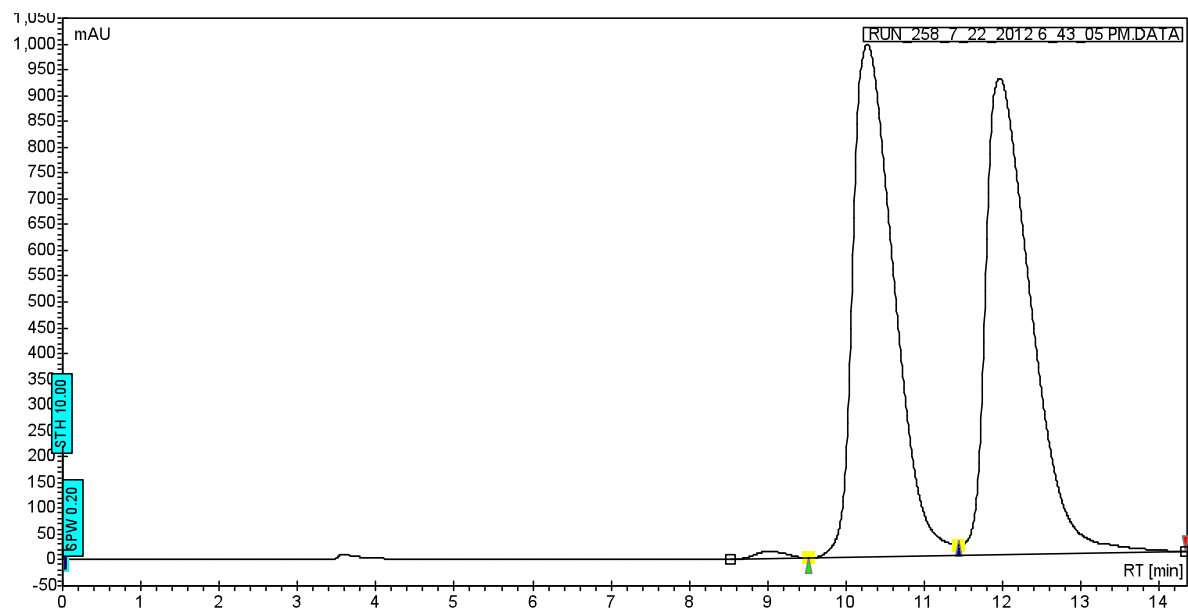

| # | Time[min] | Area[%] |
|---|-----------|---------|
| 1 | 10.27     | 49.33   |
| 2 | 11.97     | 50.67   |

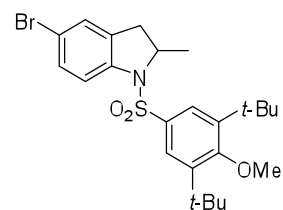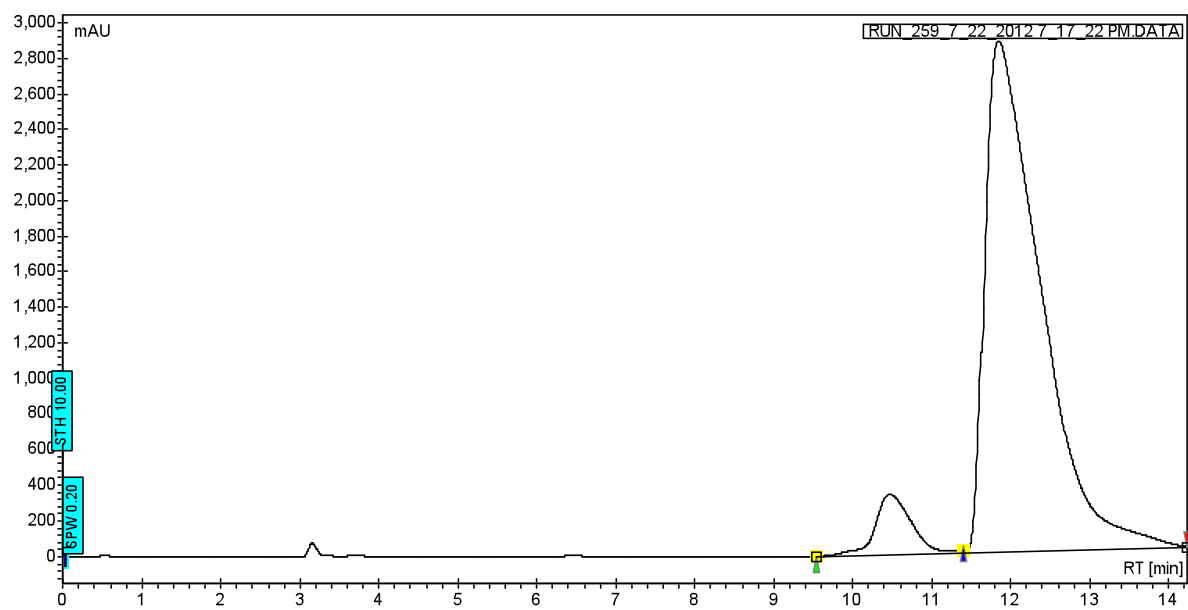

| # | Time[min] | Area[%] |
|---|-----------|---------|
| 1 | 10.47     | 7.16    |
| 2 | 11.85     | 92.84   |

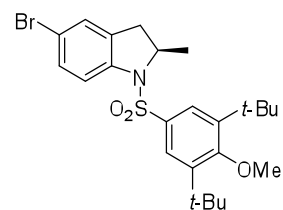

Supplement: NIHMS403790-supplement-1_si_001.pdf [file NIHMS403790-supplement-1_si_001.pdf]
