# Supplementary material
Source: PubMed Central journal article supplement (PMC3519432)
Supplement: NIHMS403790-supplement-2_si_002.pdf [file NIHMS403790-supplement-2_si_002.pdf]

**Chiral Indoline Synthesis Via Enantioselective Copper-Catalyzed Alkene Hydroamination/Cyclization**

Benjamin W. Turnpenny,<sup>‡</sup> Kianté L. Hyman<sup>‡</sup> and Sherry R. Chemler\*

Department of Chemistry, University at Buffalo,  
The State University of New York, Buffalo, NY 14260, [schemler@buffalo.edu](mailto:schemler@buffalo.edu)

**Supporting Information II****Table of Contents**

<sup>1</sup>H and <sup>13</sup>C NMR Spectra

S-2



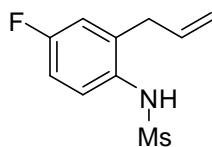

1d

blt2-rxn484pg199pure1  
 Sample Name:  
 Data Collected on:  
 roesy.chem.buffalo.edu-mercury300  
 Archive directory:  
 Sample directory:  
 FidFile: PROTON  
 Pulse Sequence: PROTON (s2pu1)  
 Solvent: cdc13  
 Data collected on: Jul 31 2012  
 Temp. 25.0 C / 298.1 K  
 Operator: Sherry  
 Relax. delay 1.000 sec  
 Pulse 45.0 degrees  
 Acq. time 1.700 sec  
 Width 4600.1 Hz  
 8 repetitions  
 OBSERVE H1, 300.0738017 MHz  
 DATA PROCESSING  
 FT size 15364  
 Total time 9 min 29 sec

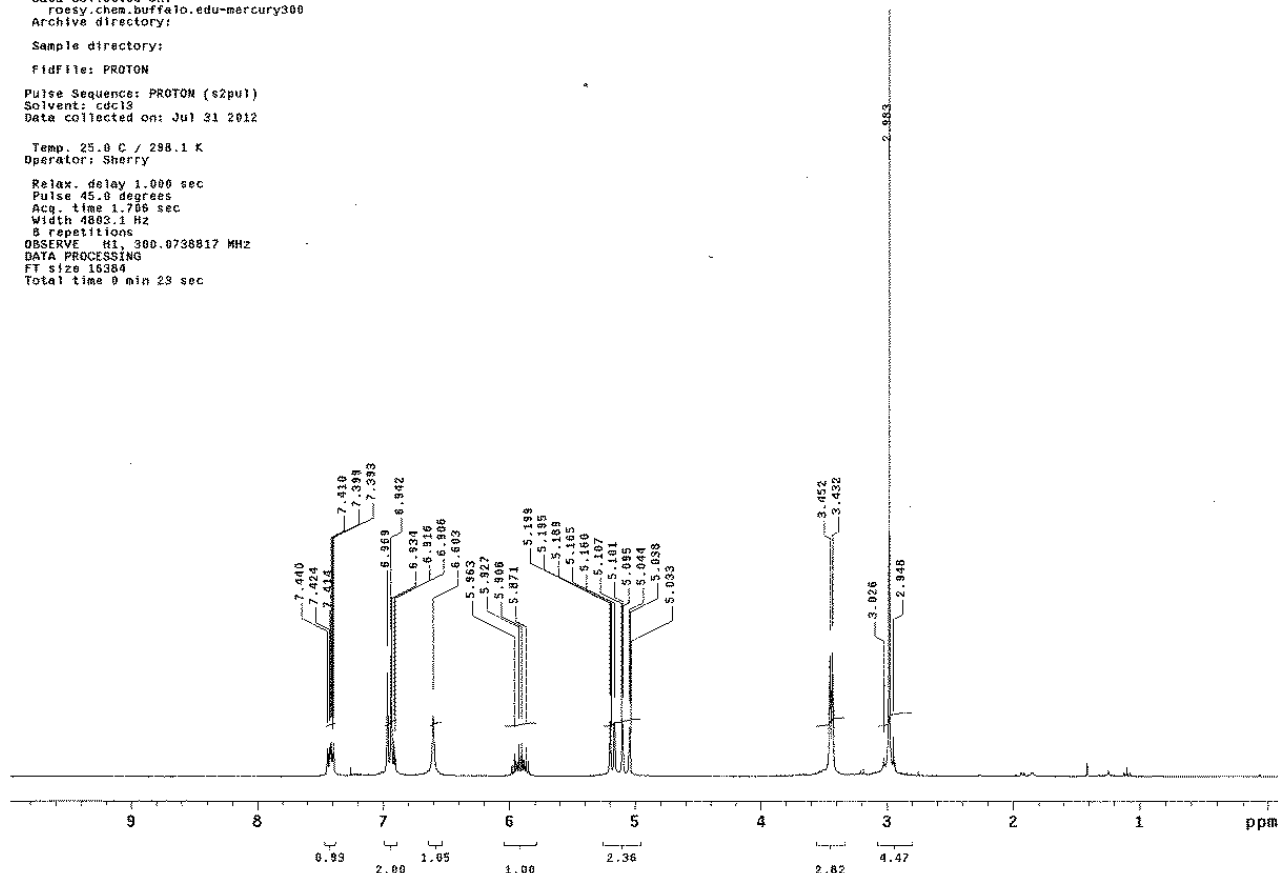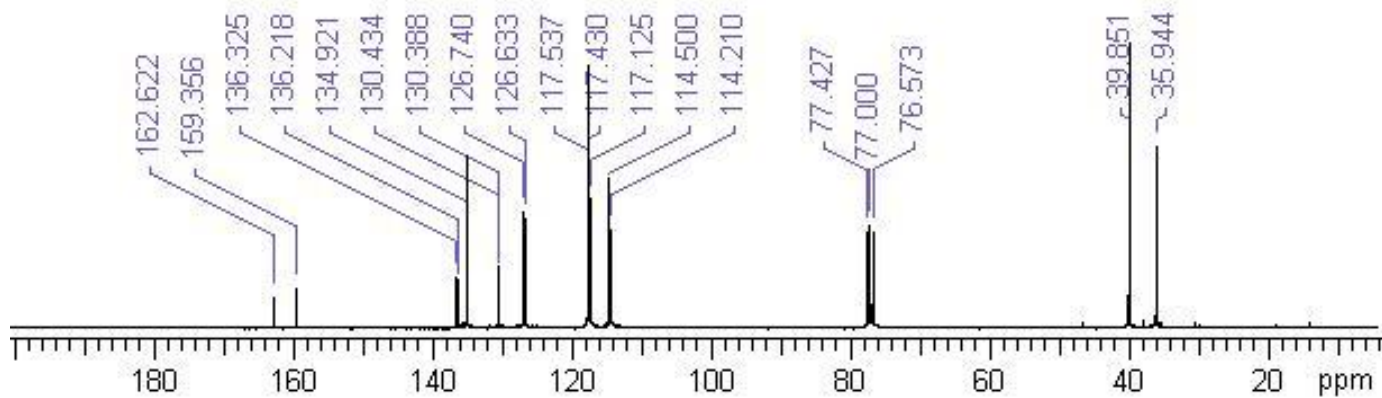

yp

12.0

cr

92.07

vs

123.2

delta

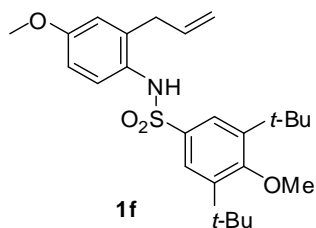

blt2-rxn395pg110pure1  
 Sample Name:  
 Data Collected on:  
 chemmr500.chem.buffalo.edu-inova500  
 Archive directory:  
 Sample directory:  
 Fidfile: PROTON  
 Pulse Sequence: PROTON (s2pul)  
 Solvent: ccd3  
 Data collected on: Jul 24 2012  
 Temp: 25.8 C / 298.1 K  
 Operator: Chemler  
 Relax. delay 1.000 sec  
 Pulse 45.0 degrees  
 Acq. time 2.048 sec  
 Width 8000.0 Hz  
 8 repetitions  
 OBSERVE M1, 499.8984050 MHz  
 DATA PROCESSING  
 FT size 32768  
 Total time 0 min 24 sec

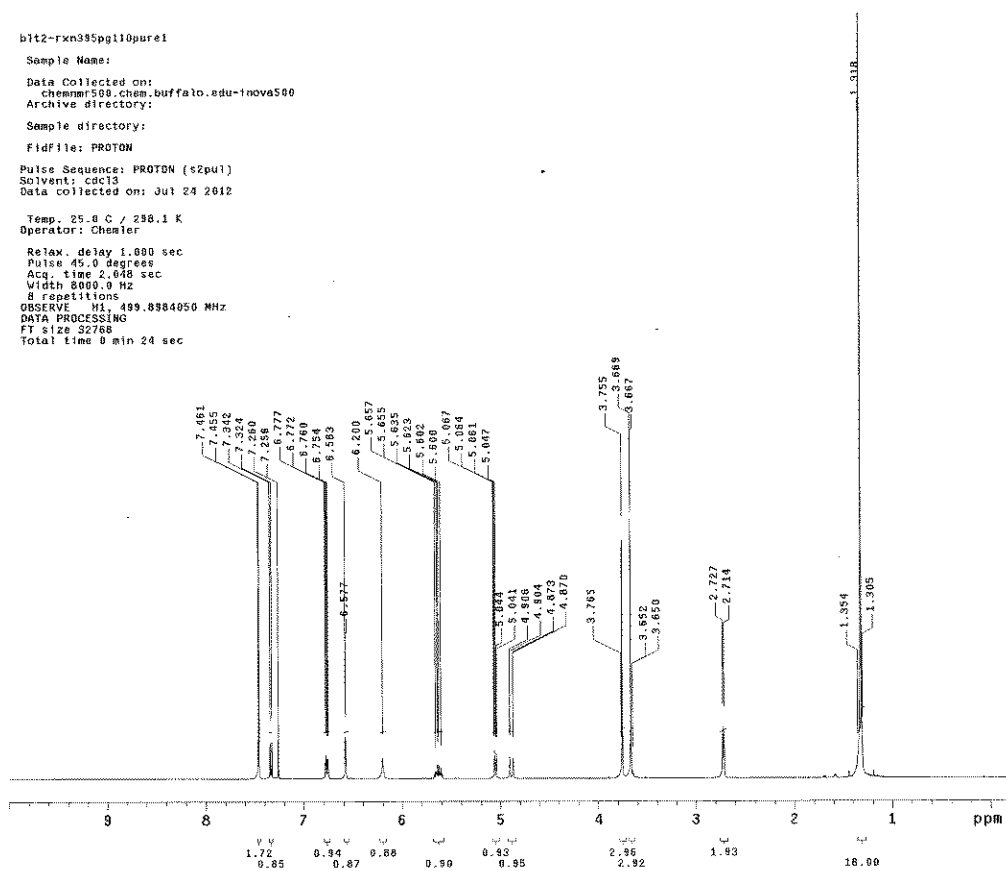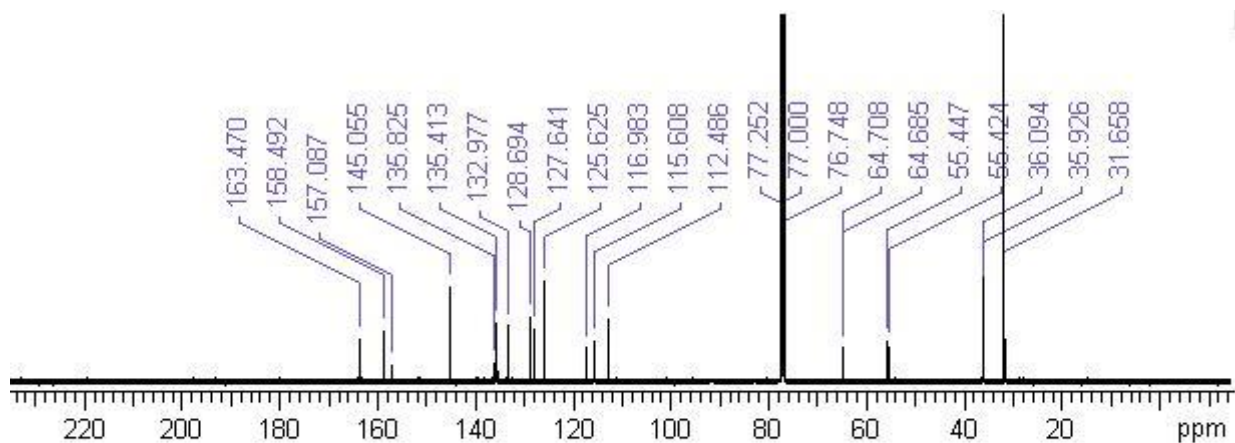

vp  
12.0

cf  
32.99

vs  
1338.2

delta

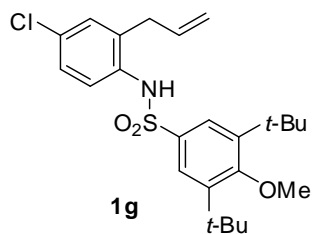

blt2-rxn-p-cl-arylsubstrate

Sample Name:  
DC-173  
Data Collected on:  
chemner400.chem.buffalo.edu-inova400  
Archive directory:  
Sample directory:  
Fidfile: PROTON

Pulse Sequence: PROTON (s2pu1)  
Solvent: cdcl3  
Data collected on: Jul 31 2012

Temp. 25.0 C / 298.1 K  
Operator: Chemler

Relax. delay 1.000 sec  
Pulse 45.0 degrees  
Acq. time 2.365 sec  
Width 6367.7 Hz  
18 repetitions  
OSSERVE H1: 399.9389027 MHz  
DATA PROCESSING  
F1 size 32768  
Total time 0 min 58 sec

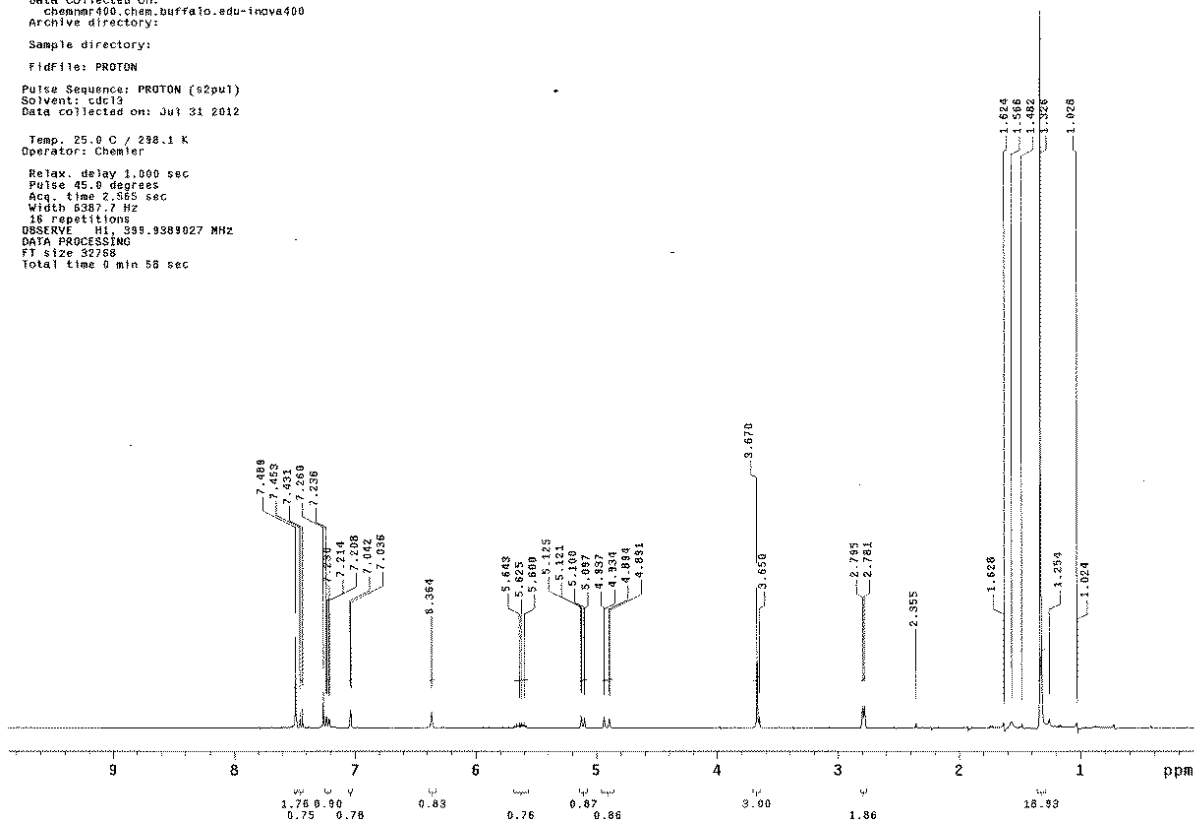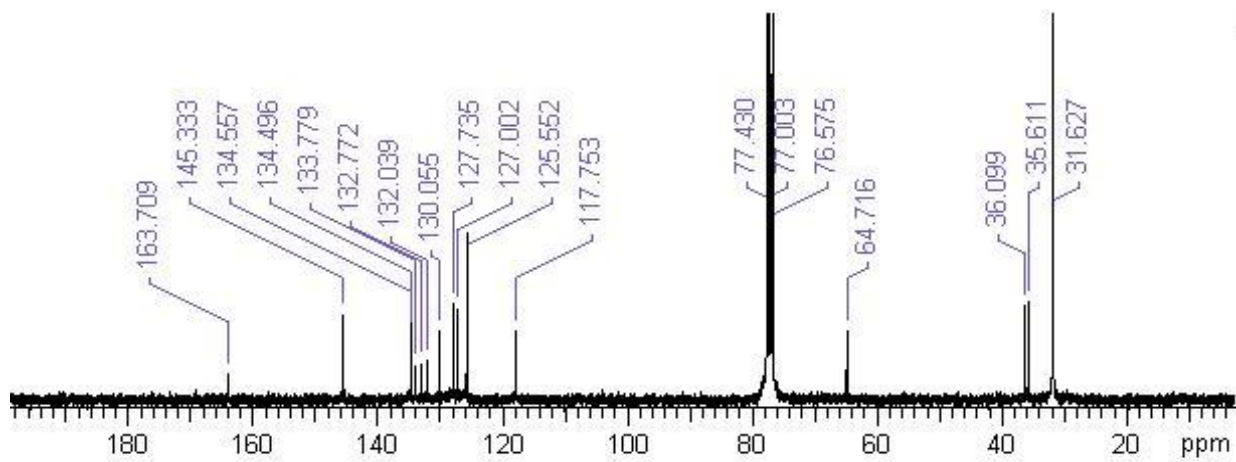

vp

0

cr

181.39

vs

1464.2

delta

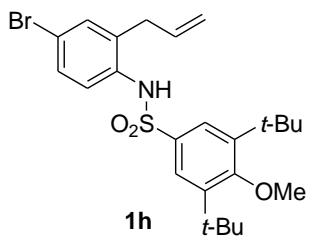

blt2-rxn478pg133pure1  
 Sample Name:  
 Data Collected on:  
 chemnar400.chem.buffalo.edu-inova400  
 Archive directory:  
 Sample directory:  
 FidFile: blt2-rxn478pg133pure1  
 Pulse Sequence: PROTON (s2pu1)  
 Solvent: cdcl3  
 Data collected on: Jul 6 2012  
 Temp. 25.0 C / 298.1 K  
 Operator: Chemler  
 Relax. delay 1.000 sec  
 Pulse 45.0 degrees  
 Acq. time 2.565 sec  
 Width 8387.7 Hz  
 8 repetitions  
 OBSERVE H1, 399.9389023 MHz  
 DATA PROCESSING  
 FT size 92768  
 Total time 0 min 29 sec

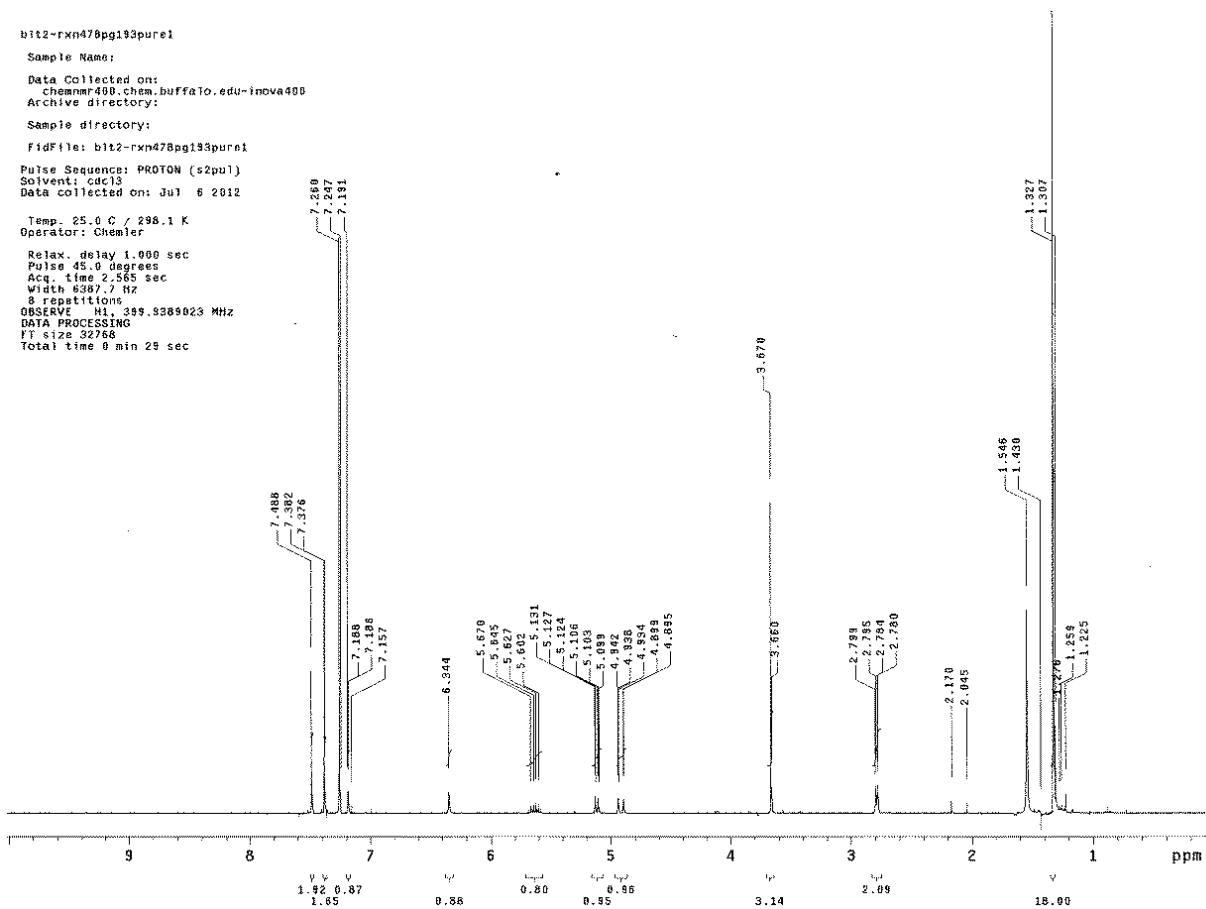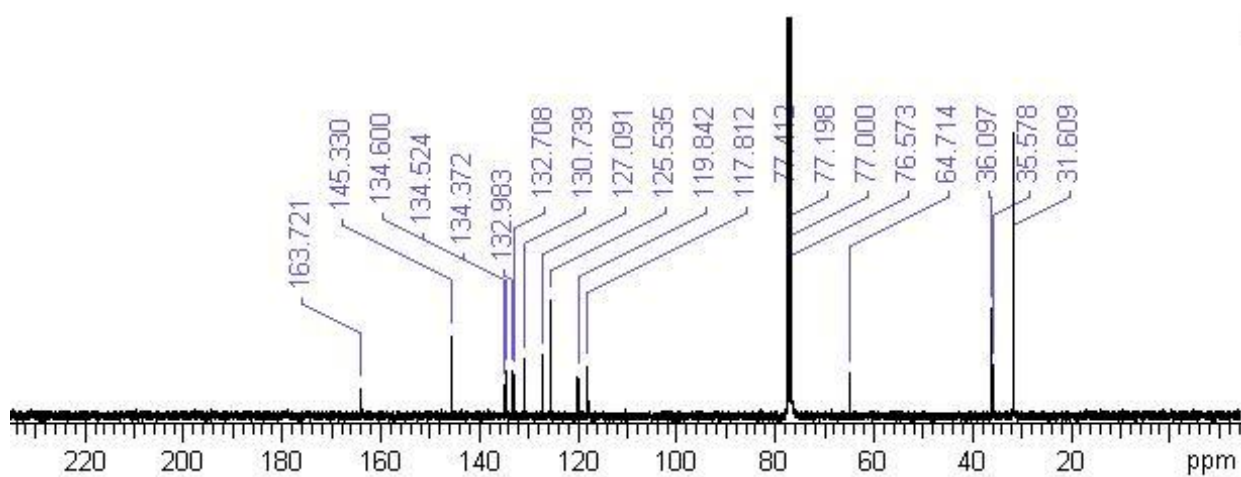

vp

0

cr

80.16

vs

1138.0

delta

7.14

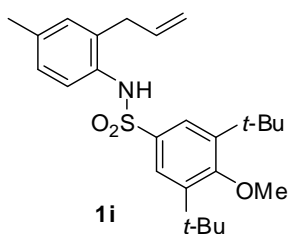

bit2-rxn468pg184pure1

Sample Name:

Data Collected on:  
chemnmr400.chem.buffalo.edu-inova400

Archive directory:

Sample directory:

Fidfile: bit2-rxn468pg184pure1

Pulse Sequence: PROTON (s2pul)

Solvent: cdcl3

Data collected on: Jul 9 2012

Temp. 25.0 C / 298.1 K

Operator: Chemler

Relax. delay 1.000 sec

Pulse 45.0 degrees

Acq. time 2.585 sec

Width 6387.7 Hz

8 repetitions

OBSERVE H1, 399.8369819 MHz

DATA PROCESSING

FT size 52768

Total time 0 min 29 sec

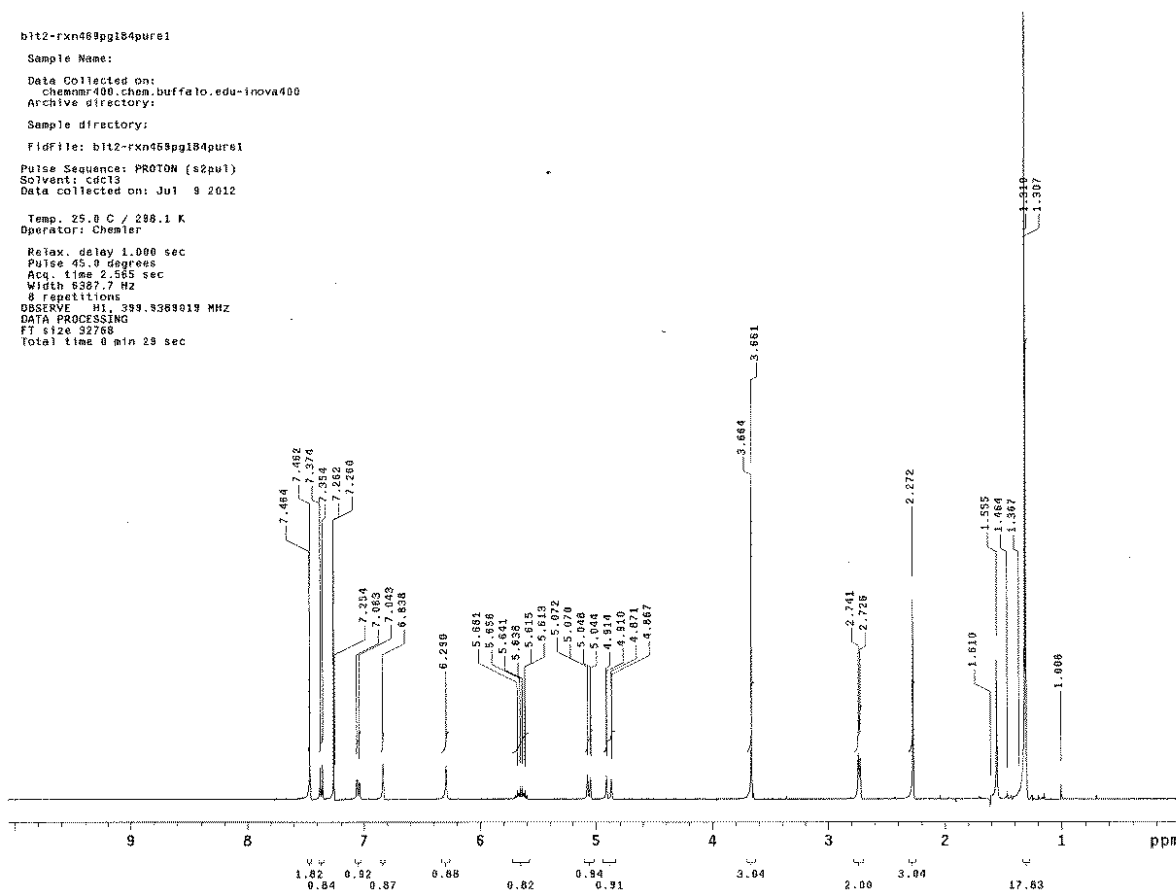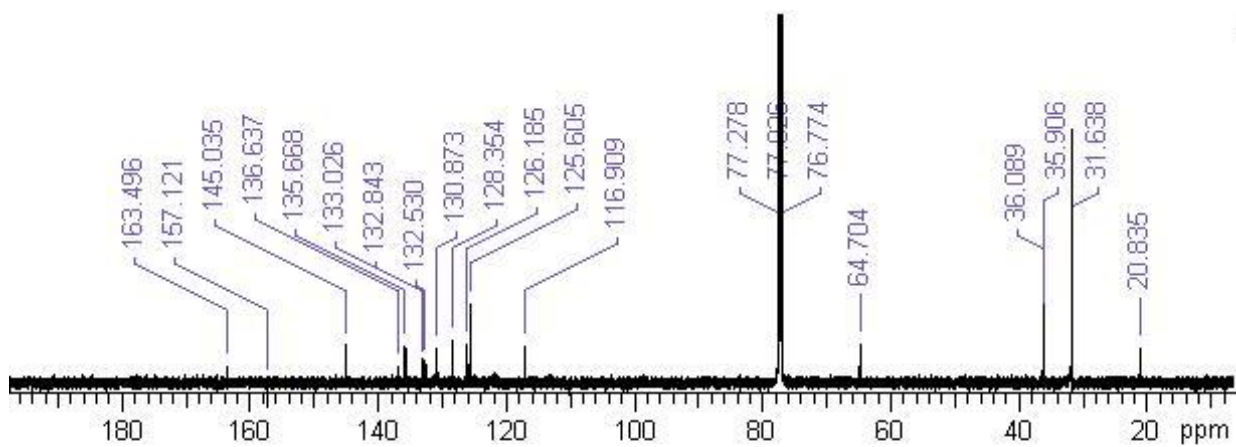vp  
12.0cf  
149.64vs  
3754.8

delta

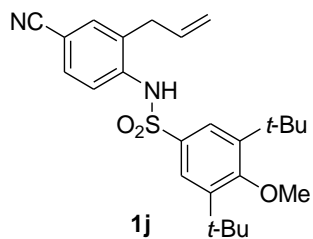

blt2-rxn446pg161pure2

Sample Name:

Data Collected on:  
F0esy.chem.buffalo.edu-mercury300

Archive directory:

Sample directory:

FidFile: blt2-rxn446pg161p2

Pulse Sequence: PROTON (s2pul)

Solvent: cdcl3

Data collected on: Aug 1 2012

Temp: 25.0 C / 298.1 K

Operator: Sherry

Relax. delay 2.000 sec

Pulse 45.0 degrees

Acq. time 1.766 sec

Width 4800.1 Hz

8 repetitions

OBSERVE H1, 300.0738817 MHz

DATA PROCESSING

FT size 16384

Total time 0 min 31 sec

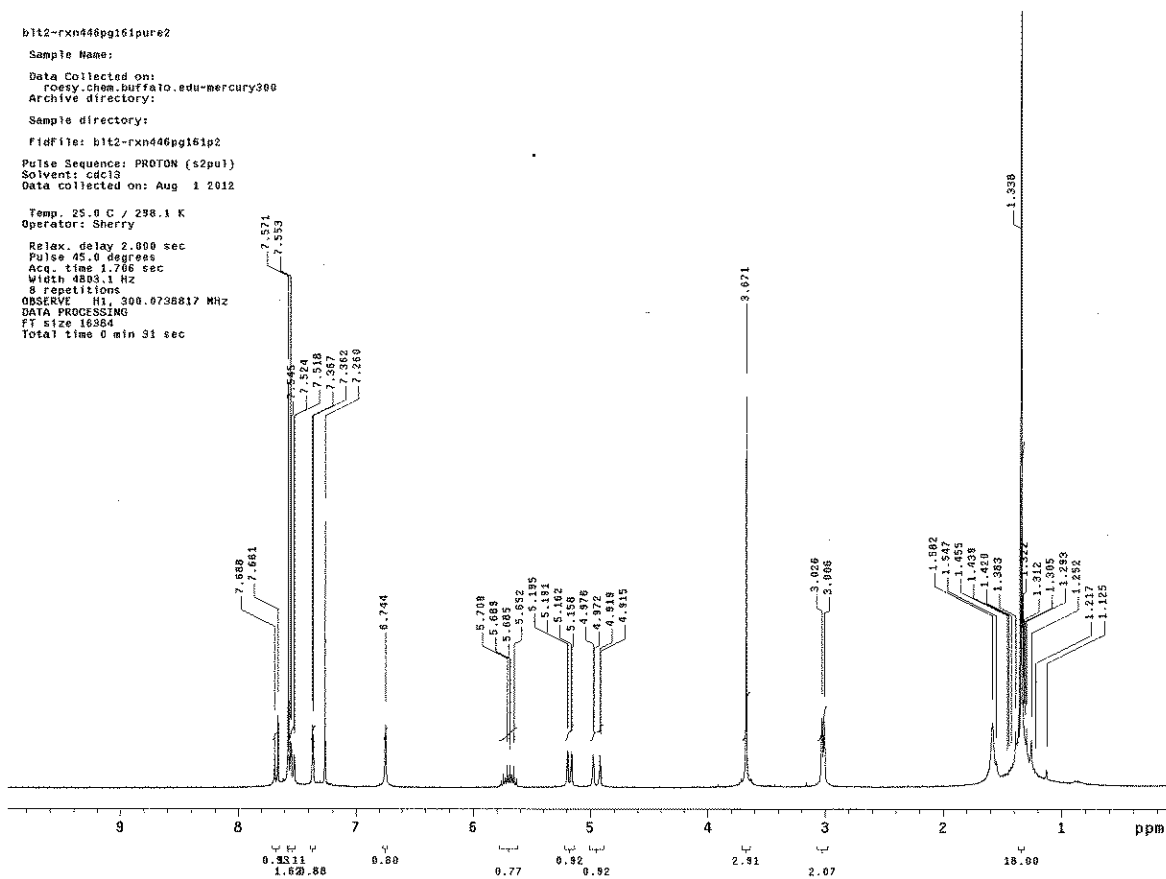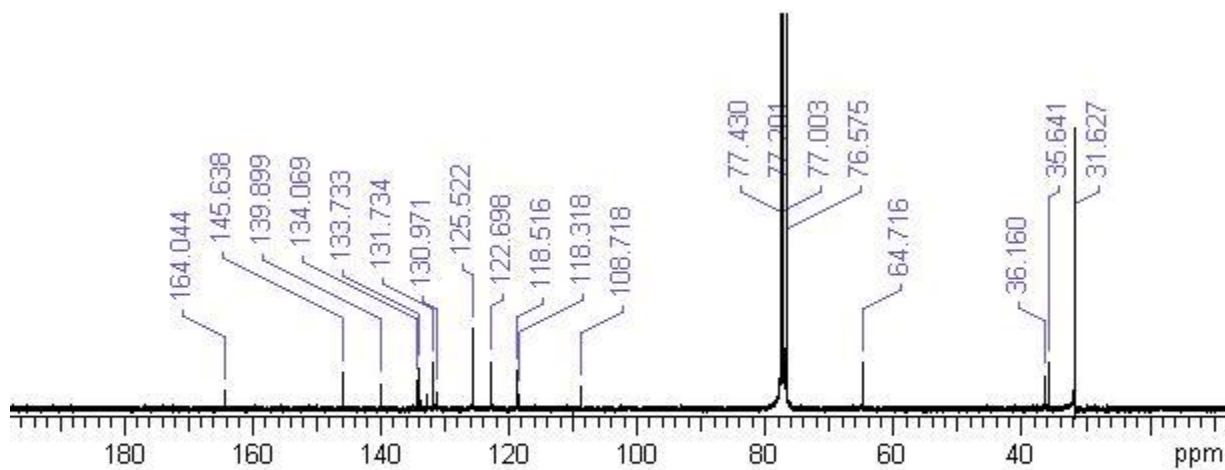

vp

cr

vs

delta

197.50

666.0



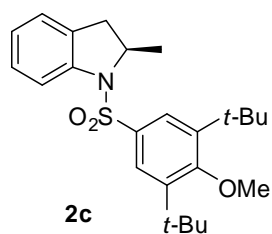

blt2-rxn464pg179pure1

Sample Name:

Data Collected on:  
chemmr400.chem.buffalo.edu-inova400

Archive directory:

Sample directory:

Fidfile: blt2-rxn464pg179pure1

Pulse Sequence: PROTON (s2pul)  
Solvent: cdcl3

Data collected on: Jul 17 2012

Temp. 25.0 C / 298.1 K  
Operator: Chemler

Relax. delay 1.000 sec

Pulse 45.0 degree

Acq. time 2.565 sec

Width 6367.7 Hz

8 repetitions

OBSERVE M1, 399.9289023 MHz

DATA PROCESSING

FT size 32766

Total time 0 min 29 sec

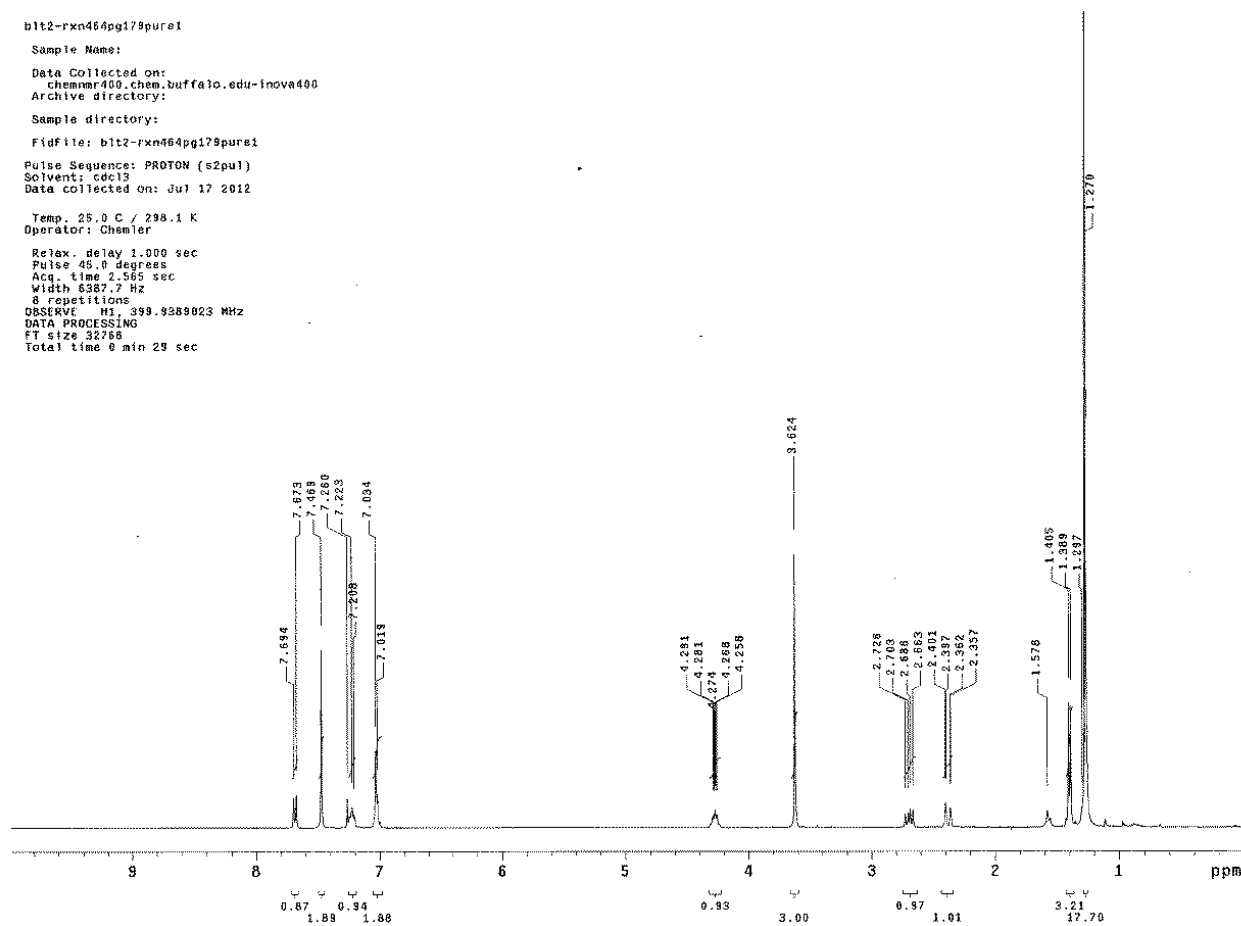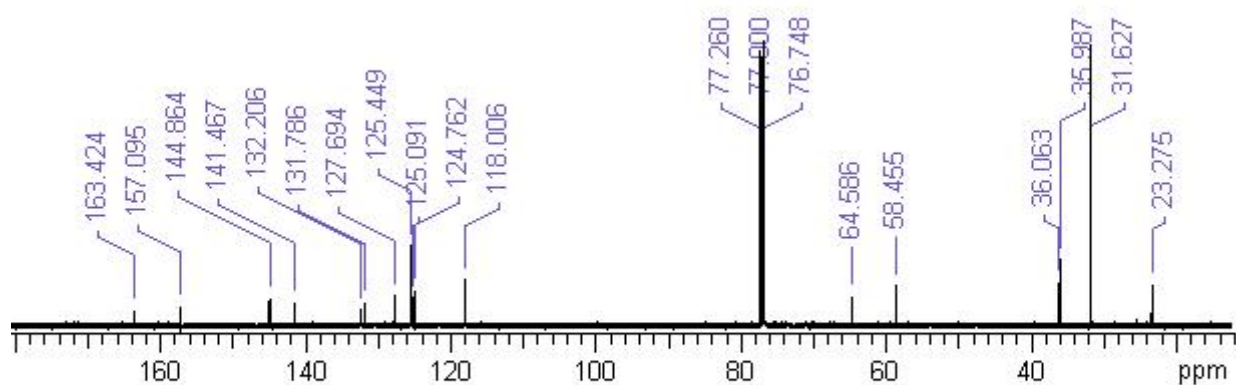

vp

0

th

5.3

vs

767.3

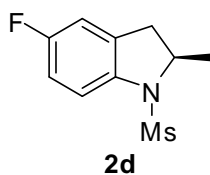

blt2-rxn488pg203pure1

Sample Name:

Date Collected on:  
chemnar400.chem.buffalo.edu-inova400

Archive directory:

Sample directory:

FidFile: blt2-rxn488pg203pure1

Pulse Sequence: PROTON (s2cp1)

Solvent: cdcl3

Data collected on: Jul 20 2012

Temp. 25.0 C / 298.1 K

Operator: Chemler

Relax. delay 1.000 sec

Pulse 45.0 degrees

Acq. time 2.365 sec

Width 6987.7 Hz

8 repetitions

OBSERVE F1: 399.9389027 MHz

DATA PROCESSING

FT size 32768

Total time 8 min 29 sec

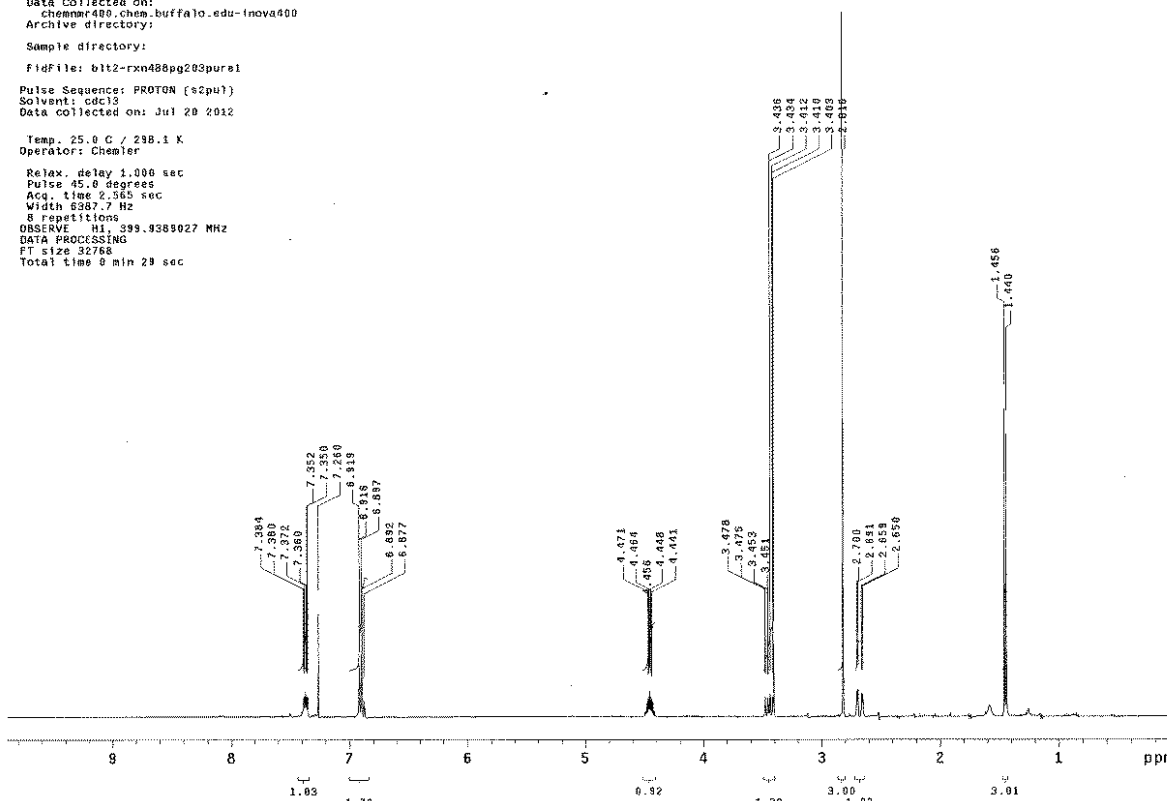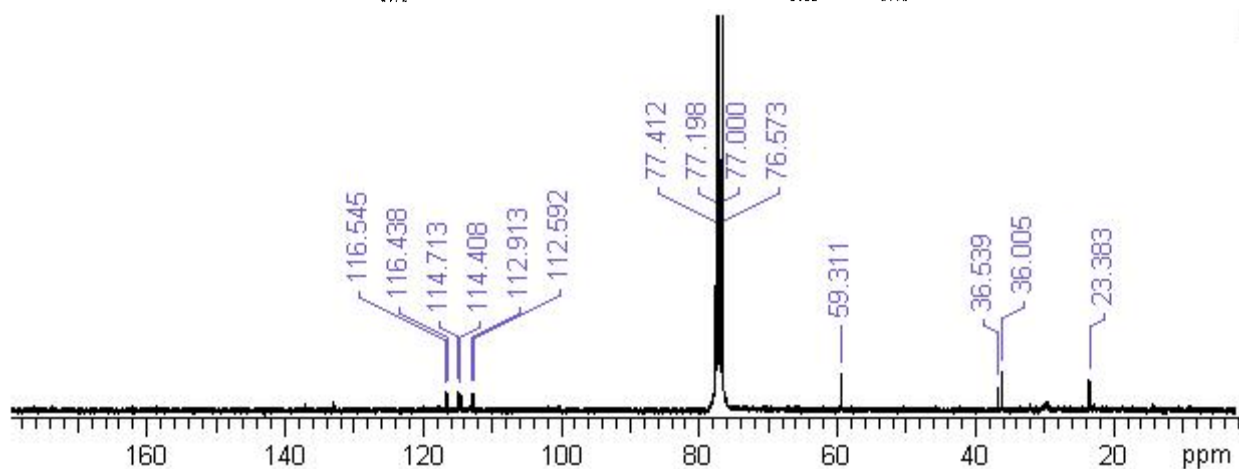

vp

0

cr

126.99

vs

1044.4

delta

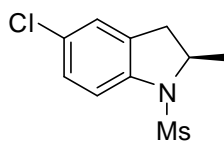

blt2-rxn486pg201prep2byhplc

Sample Name:  
DC-165pure  
Data Collected on:  
chemm500.chem.buffalo.edu-inova500  
Archive directory:

Sample directory:

Fidfile: PROTON

Pulse Sequence: PROTON (s2pu1)  
Solvent: cdcl3  
Data collected on: Jul 25 2012

Temp. 25.0 C / 298.1 K  
Operator: Chemler

Relax. delay 1.000 sec  
Pulse 45.0 degrees  
Acq. time 2.048 sec  
Width 8000.0 Hz

repetitions  
OBSERVE H1, 499.8984045 MHz  
DATA PROCESSING  
FT size 32768  
Total time 9 min 15 sec

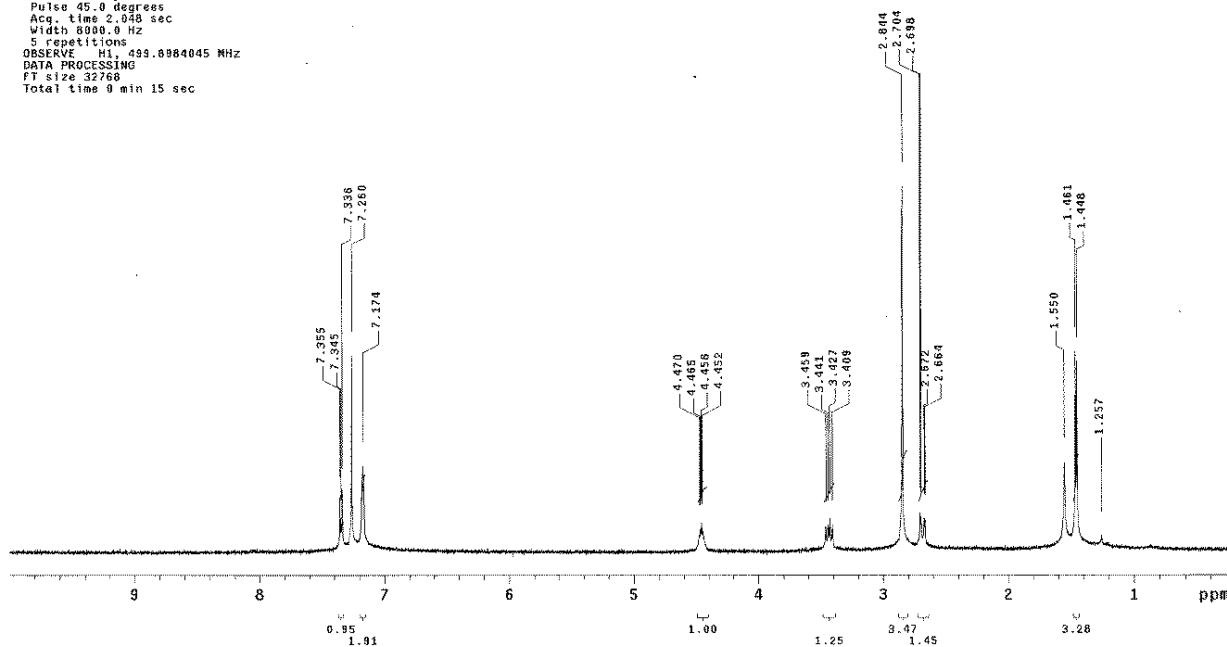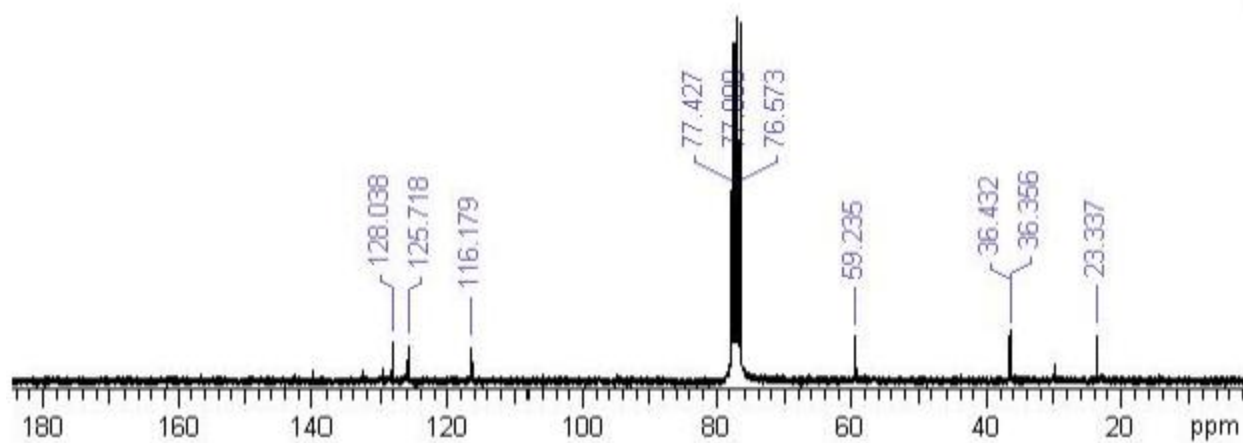

vp

cr

vs

delta

136.34

922.3

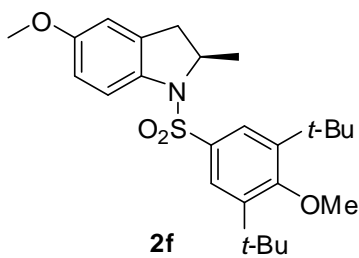

blt2-rxn425pg144prep

Sample Name:

Data Collected on:  
chemarr400.chem.buffalo.edu-inova400

Archive directory:

Sample directory:

FidFile: blt2-rxn425pg144prep

Pulse Sequence: PROTON (s2pul)

Solvent: cdcl3

Data collected on: Aug 2 2012

Temp. 25.0 C / 298.1 K

Operator: Chemler

Relax. delay 1.000 sec

Pulse 45.0 degrees

Acq. time 2.585 sec

Width 8387.7 Hz

8 repetitions

OBSERVE H1, 398.9389023 MHz

DATA PROCESSING

F1 size 32780

Total time 0 min 29 sec

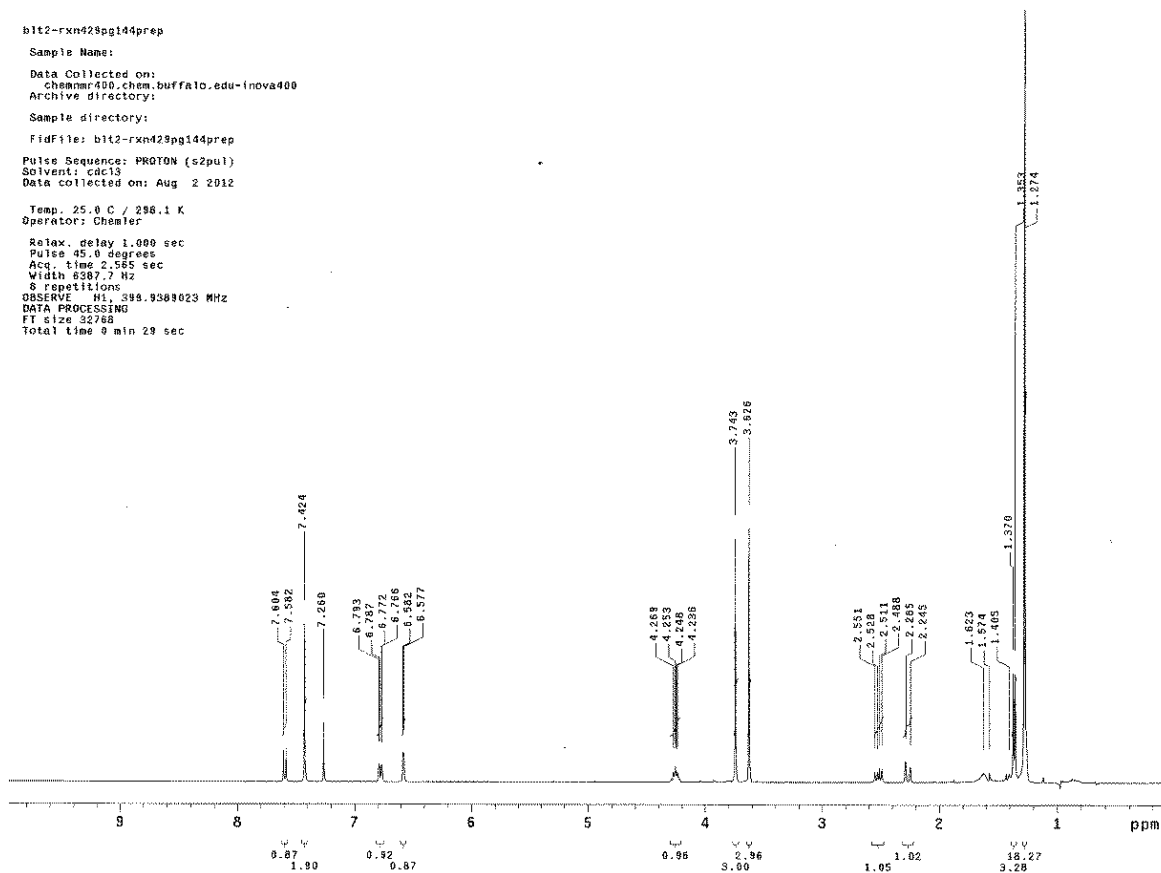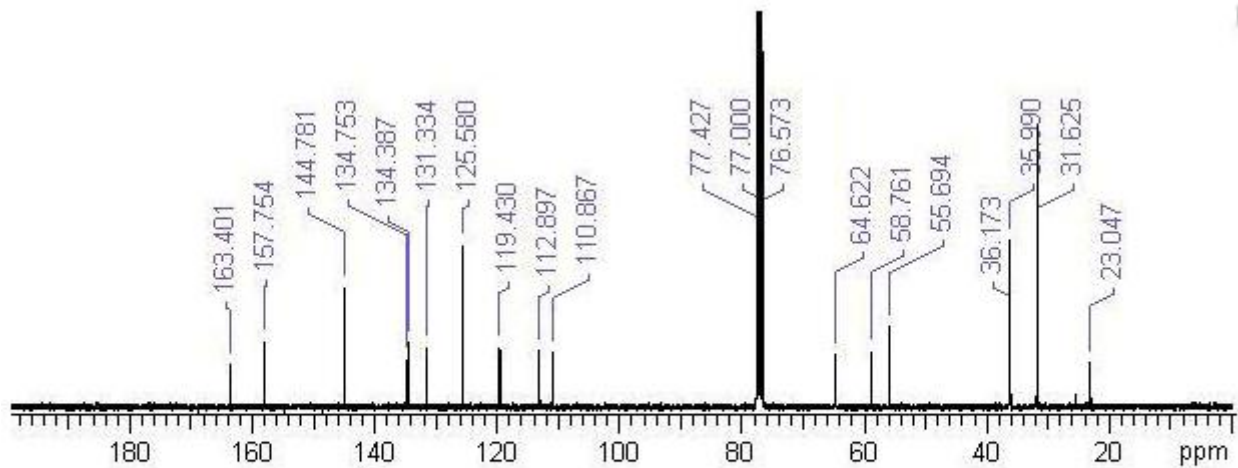

vp

0

cr

79.86

vs

798.1

delta

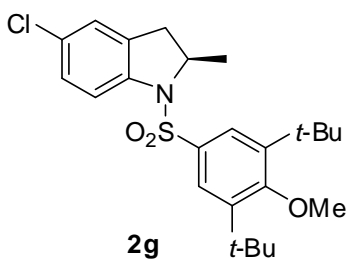

bit2-rxn380pg85prep

Sample Name:

Data Collected on:  
chemmer400,chem.buffalo.edu-inova400

Archive directory:

Sample directory:

FidFile: bit2-rxn380pg85prep

Pulse Sequence: PROTON (s2pul)

Solvent: cdcl3

Data collected on: Feb 3 2012

Temp. 25.0 C / 298.1 K

Operator: Chemler

Relax. delay 2.000 sec

Pulse 45.0 degrees

Acq. time 2.565 sec

Width 6387.7 Hz

6 repetitions

OBSERVE N1, 399.9389023 MHz

DATA PROCESSING

FT size 32768

Total time 0 min 29 sec.

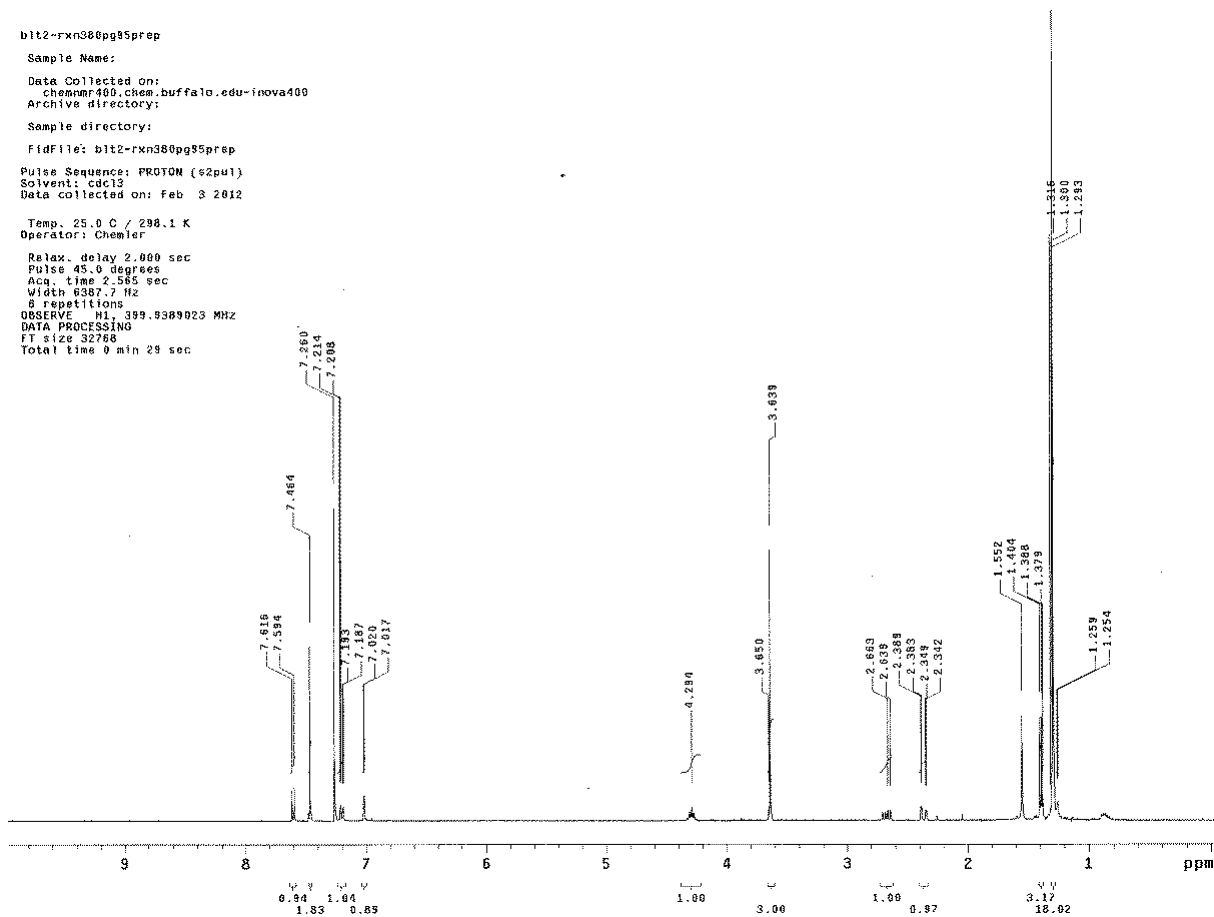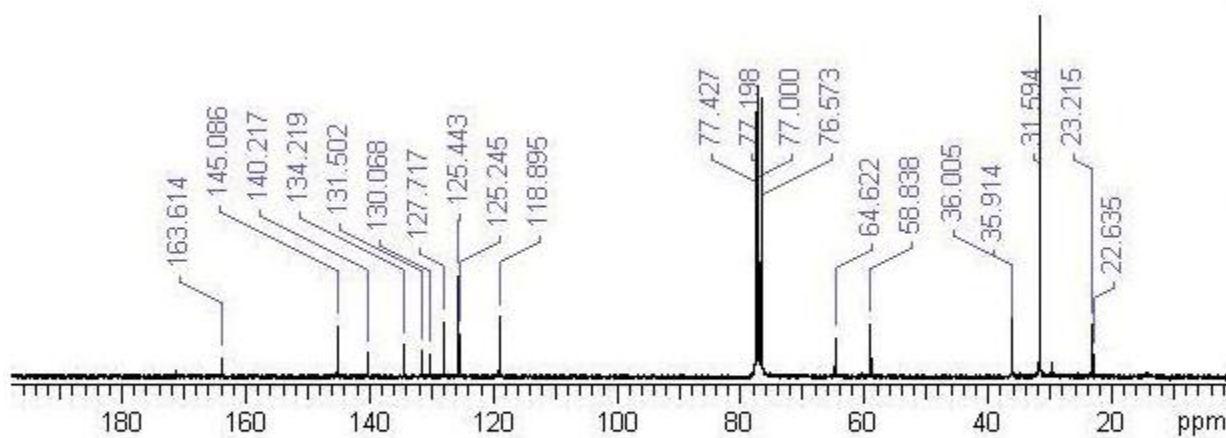

vp

0

cr

150.93

vs

425.3

delta

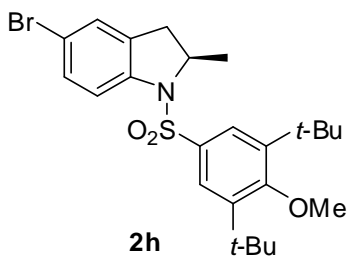

blt2-rxn481pg196pure

Sample Name:

Data Collected on:  
chemmr400.chem.buffalo.edu-inova400

Archive directory:

Sample directory:

FidFile: blt2-rxn481pg196pure1

Pulse Sequence: PROTON (s2pu1)

Solvent: cdcl3

Data collected on: Jul 17 2012

Temp. 25.0 C / 298.1 K

Operator: Chemier

Relax. delay 1.000 sec

Pulse 45.0 degrees

Acq. time 2.585 sec

Width 6387.7 Hz

8 repetitions

OBSERVE HI, 399.9389027 MHz

DATA PROCESSING

FT size 32768

Total time 0 min 28 sec

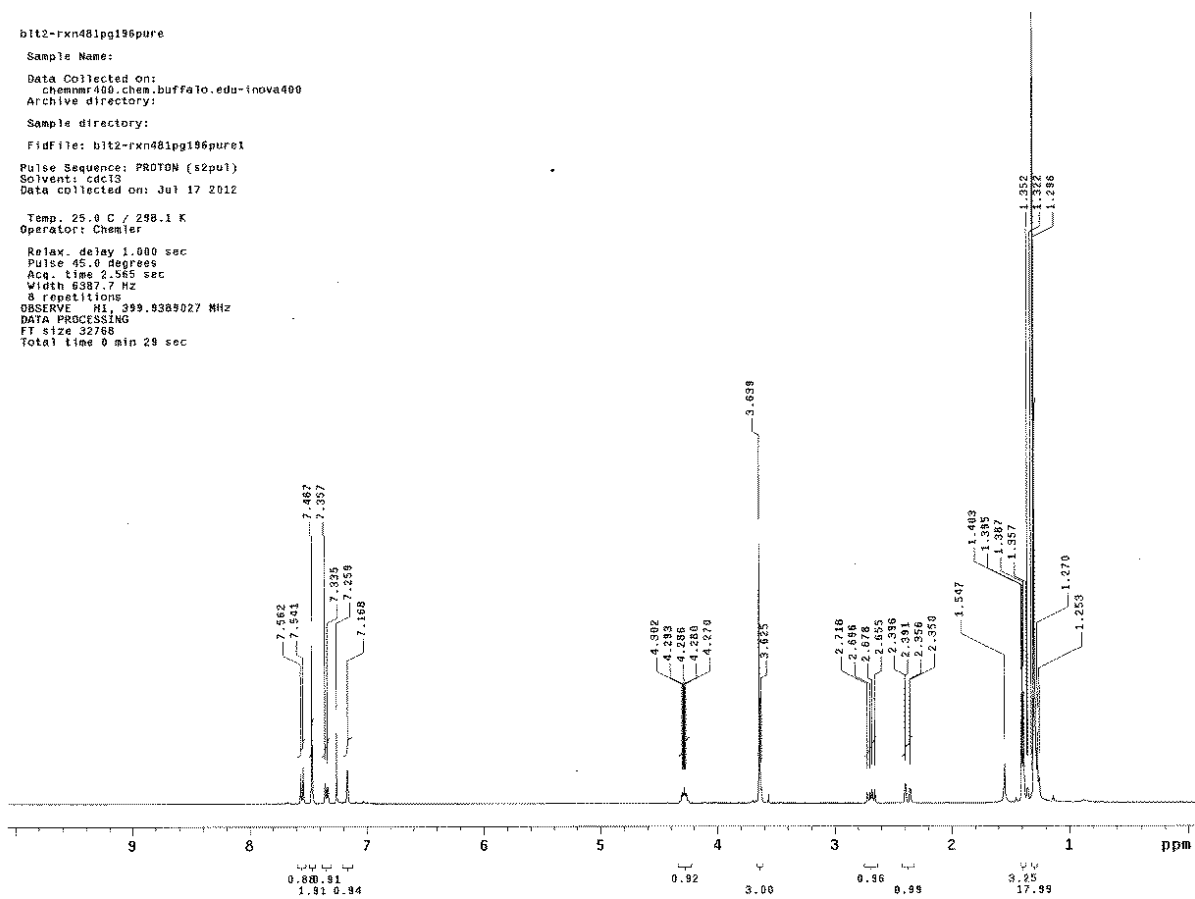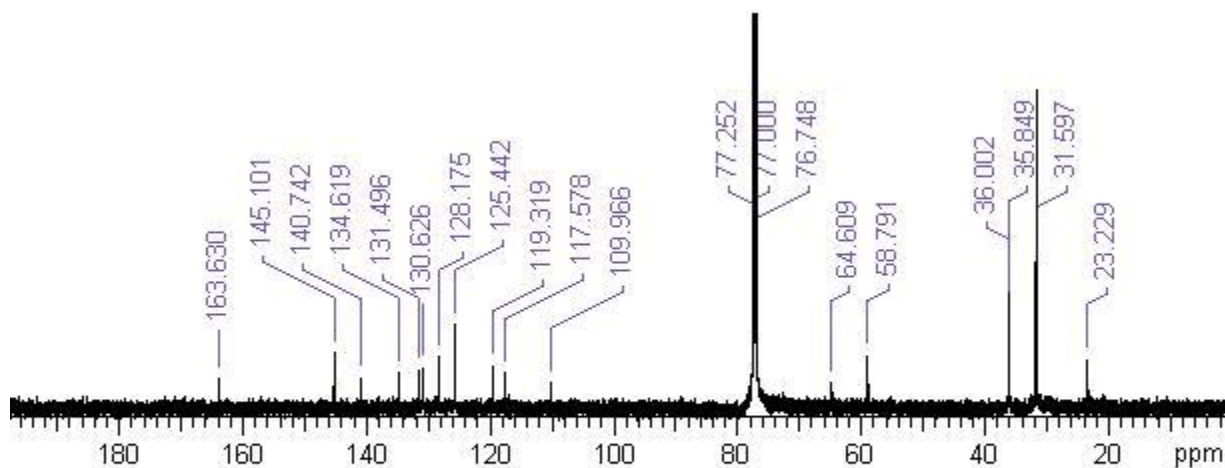

vp

cr

vs

delta

32.06

5490.6

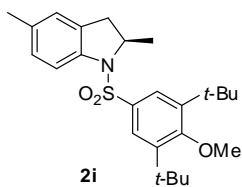

blt2-rxn473pg188prep

Sample Name:  
DC-151\_f70-on  
Data Collected on:  
chemnmr500.chem.buffalo.edu-inova500  
Archive directory:

Sample directory:

FidFile: PROTON

Pulse Sequence: PROTON (s2pu1)  
Solvent: cdcl3  
Data collected on: Jul 16 2012

Temp. 25.0 C / 298.1 K  
Operator: Chemier

Relax. delay 1.000 sec  
Pulse 45.0 degrees  
Acq. time 2.048 sec  
Width 8000.0 Hz  
5 repetitions

OBSERVE H1, 499.8964060 MHz  
DATA PROCESSING  
F1 size 32768  
Total time 0 min 15 sec

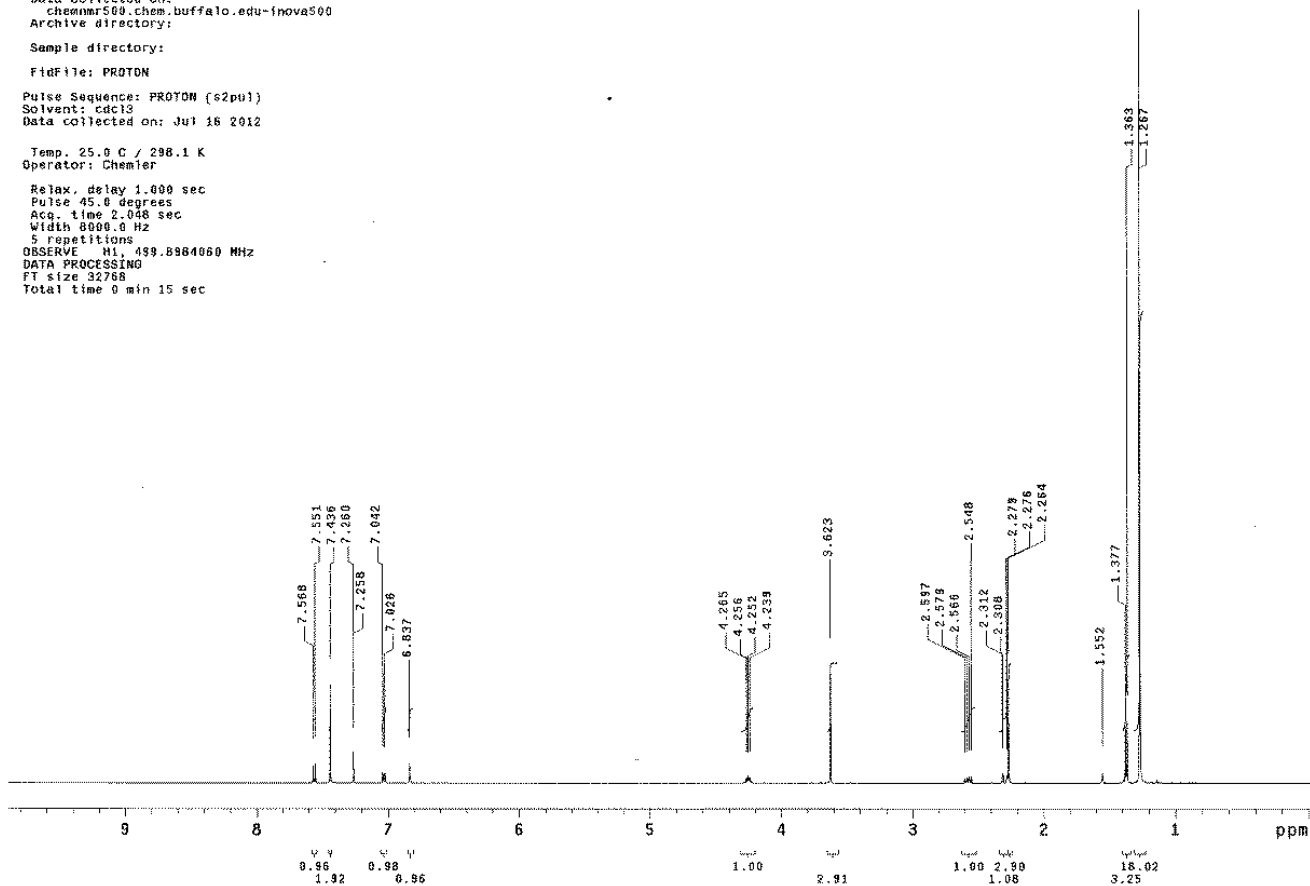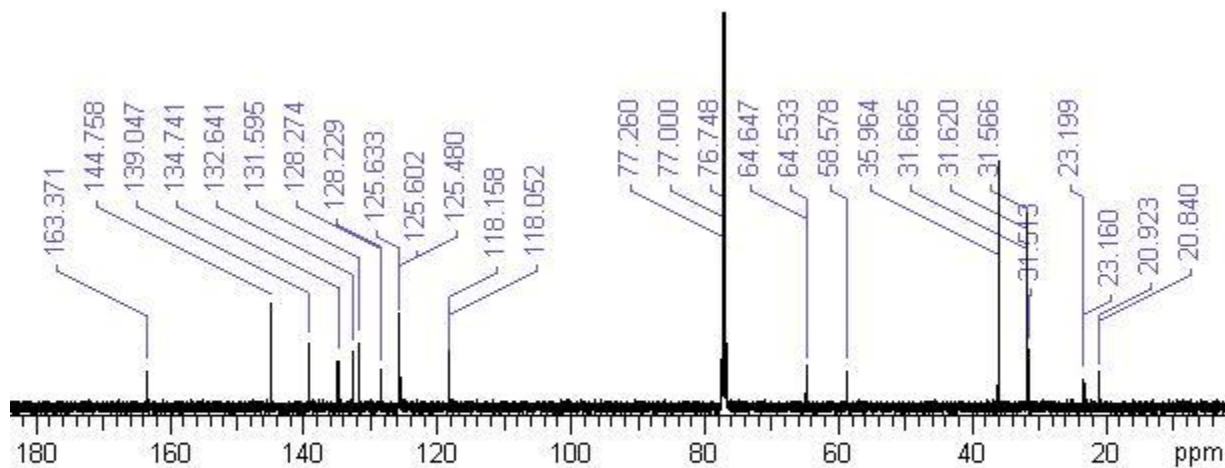

vp

cr

vs

delta

79.39

3658.6

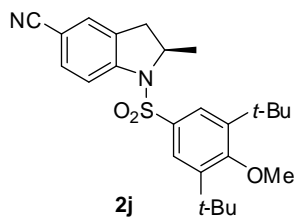

blt2-rxn470pg185prep

Sample Name:

Data Collected on:

chemmr400.chem.buffalo.edu-inova400

Archive directory:

Sample directory:

Fidfile: blt2-rxn470pg185prep1

Pulse Sequence: PROTON (s2pu1)

Solvent: cdcl3

Data collected on: Jul 30 2012

Temp. 25.0 C / 298.1 K

Operator: Chemler

Relax. delay 1.000 sec

Pulse 45.0 degrees

Acq. time 2.565 sec

Width 6387.7 Hz

8 repetitions

OBSERVE Wt. 399.9389035 MHz

DATA PROCESSING

FI size 32768

Total time 0 min 29 sec

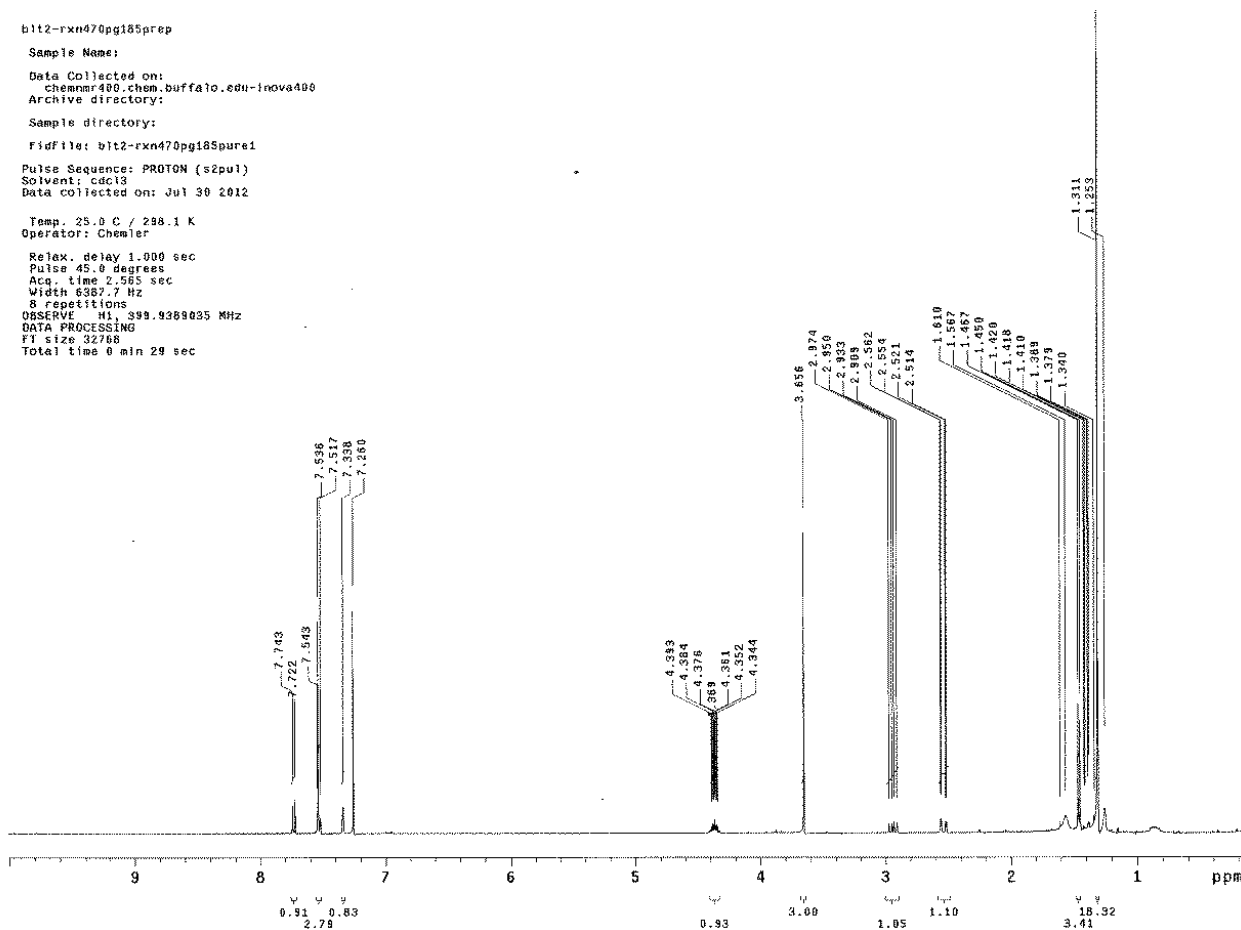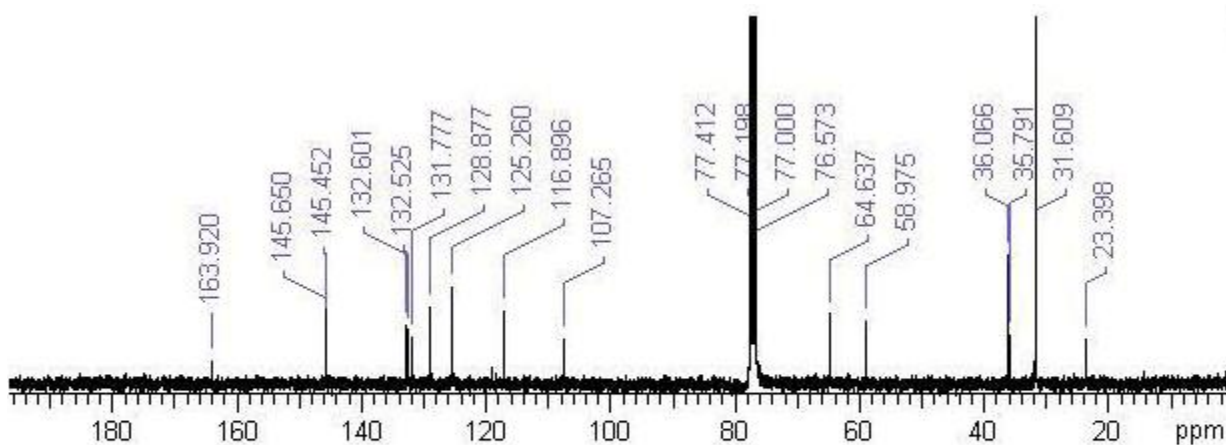

vp

12.0

cr

81.18

vs

1892.2

delta



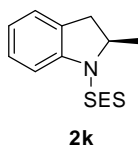

blt2-rxn490pg205prep4

Sample Name:

Data Collected on:  
chemmr400.chem.buffalo.edu-inova400

Archive directory:

Sample directory:

FidFile: blt2-rxn490pg205prep

Pulse Sequence: PROTON (s2pu1)

Solvent: cdc13

Data collected on: Jul 27 2012

Temp. 25.0 C / 298.1 K

Operator: Chemier

Relax. delay 1.000 sec

Pulse 45.0 degrees

Acq. time 2.585 sec

Width 6387.7 Hz

8 repetitions

OBSERVE H1, 399.9389027 MHz

DATA PROCESSING

FT size 32768

Total time 0 min 25 sec

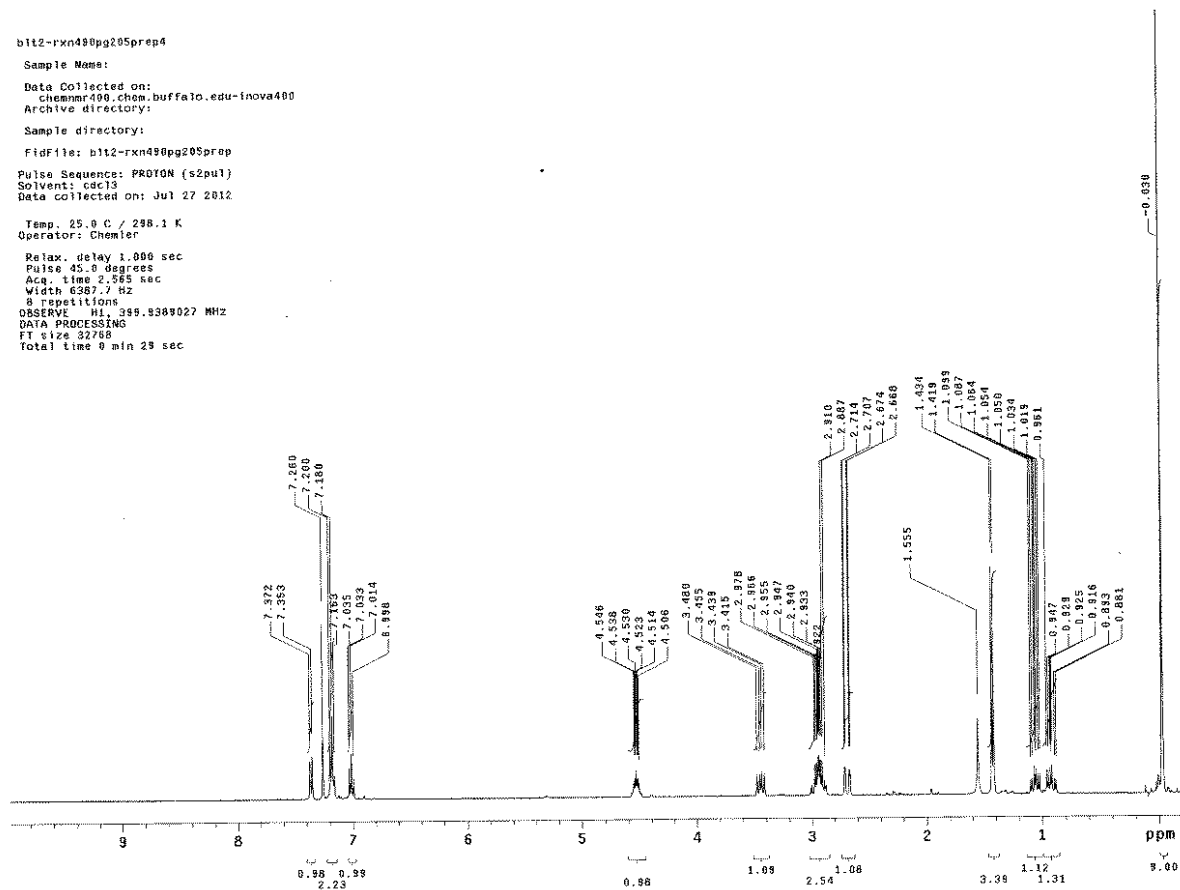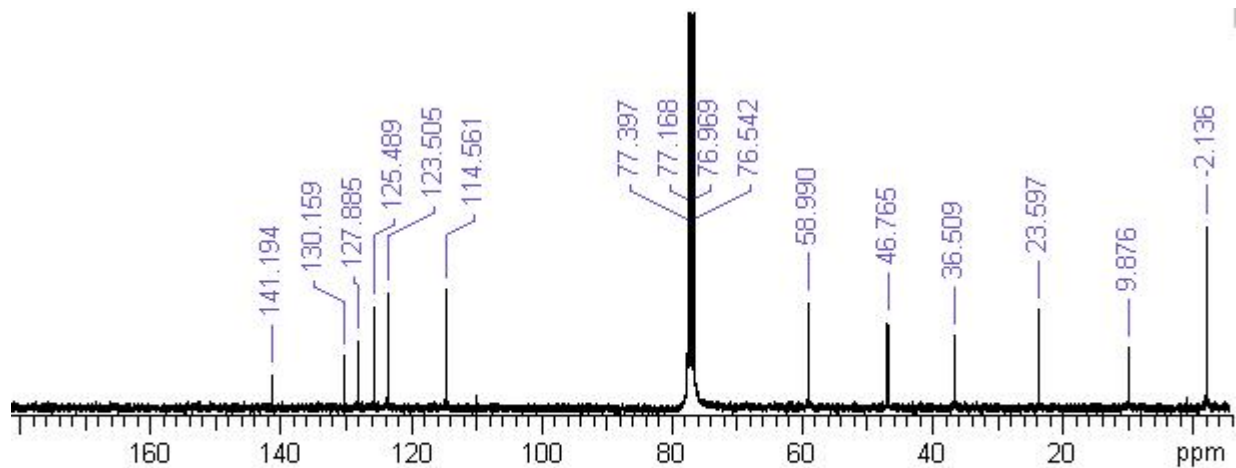

vp

D

cr

81.69

vs

1093.2

delta

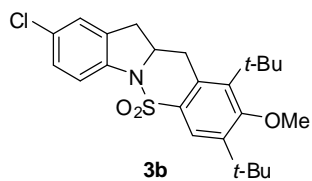

bit2-rxn379pg94prepclean

Sample Name:  
DC-173  
Data Collected on:  
chemmr400.chem.buffalo.edu-inova400  
Archive directory:

Sample directory:

Fidfile: bit2-rxn379pg94prepclean

Pulse Sequence: PROTON (s2pu1)  
Solvent: cdcl3  
Data collected on: Jul 31 2012

Temp. 25.0 C / 298.1 K  
Operator: Chemler

Relax. delay 1.000 sec  
Pulse 45.0 degrees  
Acq. time 2.585 sec  
Width 6387.7 Hz  
16 repetitions  
OBSERVE H1, 399.9389027 MHz  
DATA PROCESSING  
FT size 32768  
Total time 0 min 58 sec

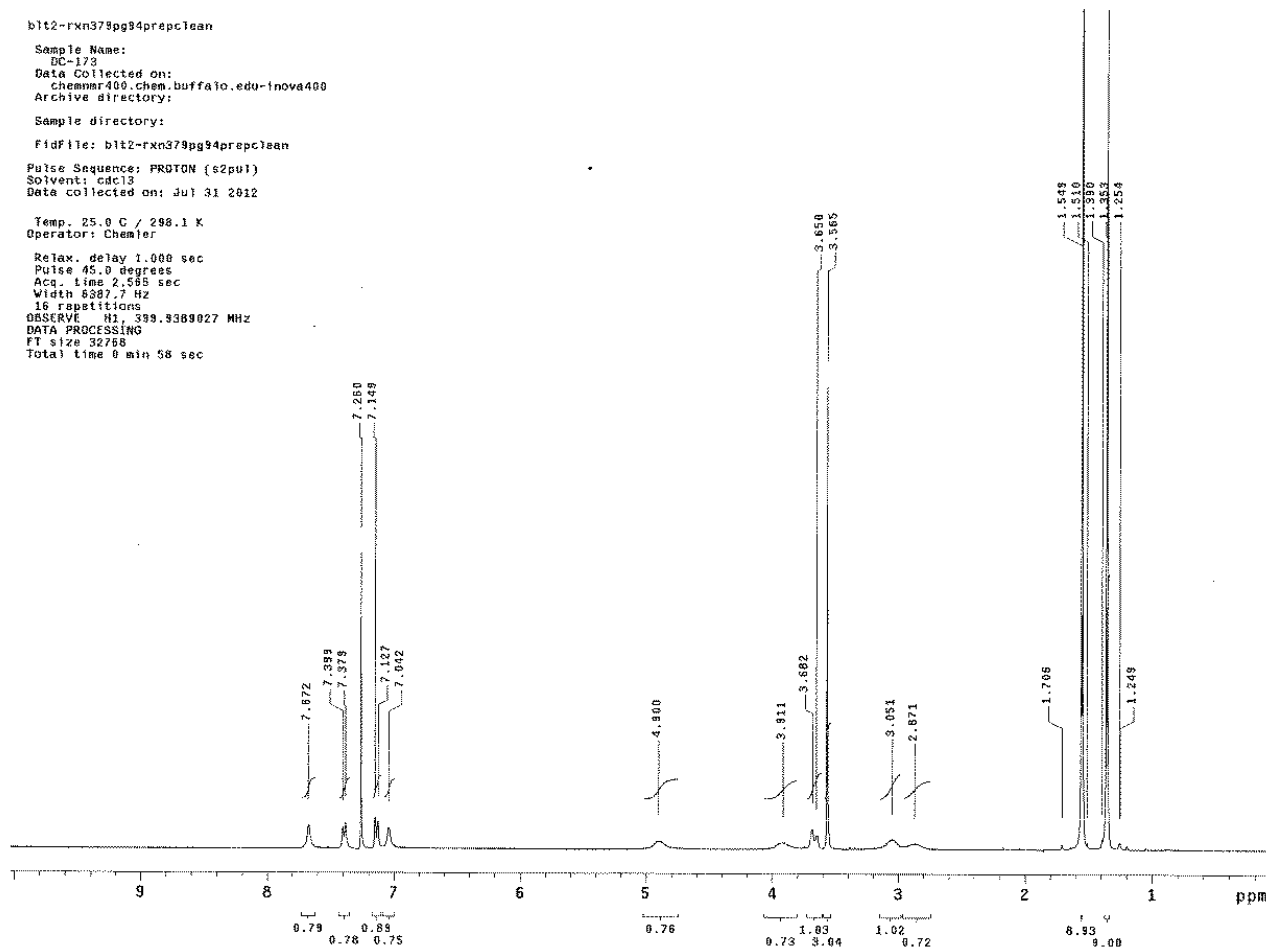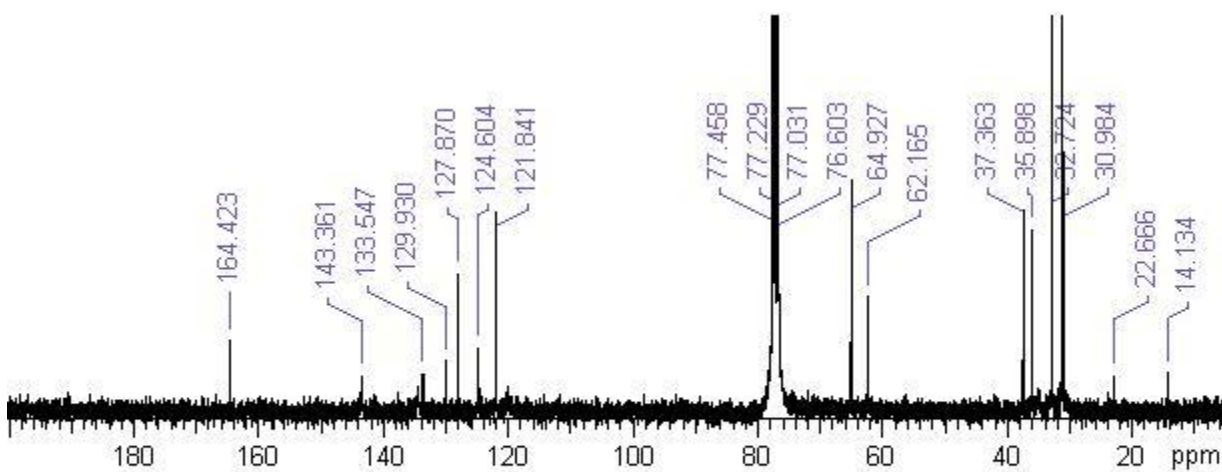

vp

cr

vs

delta

30.71

3367.2
